# Supplementary material for: Bioactivity Focus of α-Cyano-4-hydroxycinnamic acid (CHCA) Leads to Effective Multifunctional Aldose Reductase Inhibitors
Source: PubMed Central journal article supplement (PMC4842970; doi:10.1038/srep24942), 2016-04-25
Supplement: srep24942-s1.pdf [file srep24942-s1.pdf]

## Supporting information

### **Bioactivity Focus on $\alpha$ -Cyano-4-hydroxycinnamic acid (CHCA) Leads to Effective Multifunctional Aldose Reductase Inhibitors**

Laitao Zhang,<sup>†,a</sup> Yifang Li,<sup>†,§,a</sup> Sheng Yuan,<sup>†,a</sup> Shijie Zhang,<sup>†</sup> Huanhuan Zheng,<sup>†</sup> Jie Liu,<sup>†</sup> Pinghua Sun,<sup>†</sup> Yijun Gu,<sup>||</sup> Hiroshi Kurihara,<sup>†,§</sup> Rongrong He,<sup>\*,†,§</sup> and Heru Chen<sup>\*,†,§</sup>

<sup>†</sup>Institute of Traditional Chinese Medicine and Natural Product College of Pharmacy, Jinan University Guangzhou 510632, P. R. China

<sup>‡</sup>State key Laboratory of Drug Research, Shanghai Institute of Materia Medica, Chinese Academy of Sciences, Shanghai 201203, P. R. China

<sup>†</sup>Institute of Clinical Pharmacology, Guangzhou University of Chinese Medicine, Guangzhou 510006, P.R. China

<sup>||</sup>Institute of Biochemistry and Cell Biology, Chinese Academy of Sciences, Shanghai 200031, P. R. China

<sup>§</sup>Guangdong Province Key Laboratory of Pharmacodynamic Constituents of TCM and New Drugs Research, Guangzhou 510632, P. R. China

correspondence should be directed to thrchen@jnu.edu.cn

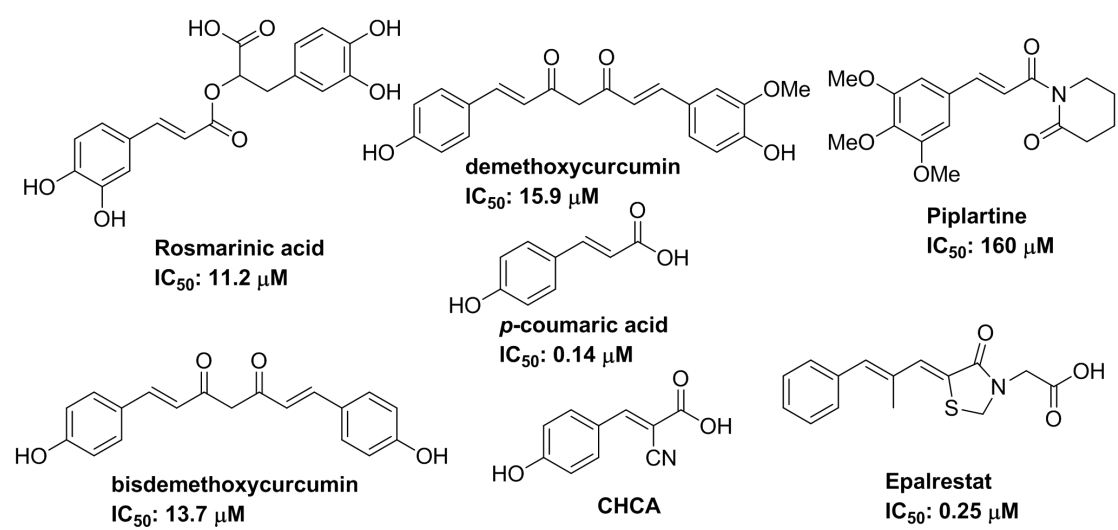

**Fig. S1.** Chemical structures of some representative ARIs.

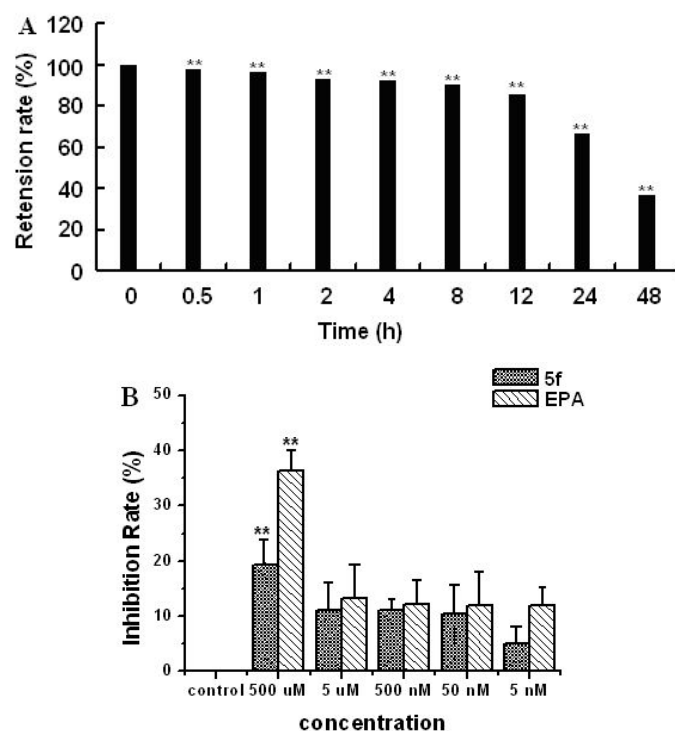

**Fig. S2.** Stability and toxicity of **5f**. **(A)** Stability studies with **5f** incubated in 5% FBS DMEM showing % retention over time. RP-HPLC was used as the assay. Analyses were scheduled at 0.5, 1.0, 4.0, 8.0, 12.0, 24.0, and 48.0 h. **\*\*** $P \leq 0.01$  vs control group. **(B)** Growth inhibition rate of **5f** and EPA against HEK293 cells. MTT assay was used to determine the cell viability. Testing samples and epalrestat at final concentrations of 5.0, 50, 500 nM, and 5.0, 50, and 500  $\mu$ M, respectively, were assessed **\*\*** $P \leq 0.01$  vs control group.

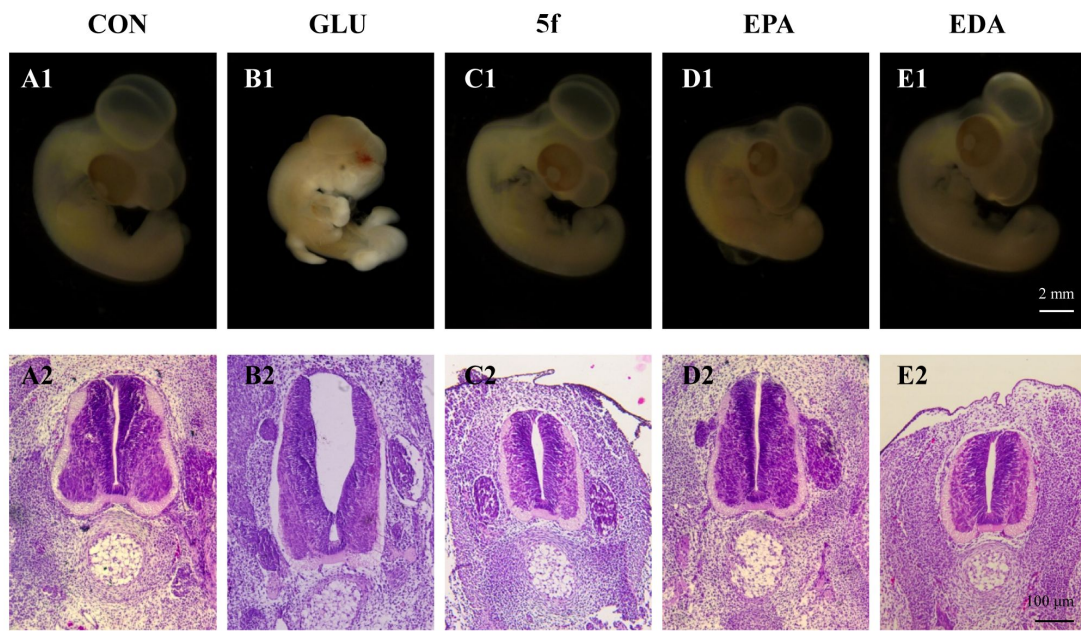

**Fig. S3.** 5f ameliorated high-glucose-induced NTD in chick embryos on EDD 5. Stereoscopic microscope measurement of whole body and Hematoxylin and eosin (H&E) staining of embryo sections. Scale bars of **A1-E1**: 2 mm. Scale bars of **A2-E2**: 100  $\mu$ m.

## II. The NMR and HRMS data of compounds 5a-j are listed in the following

### 5a (<sup>1</sup>H NMR, <sup>13</sup>C NMR, HRMS)

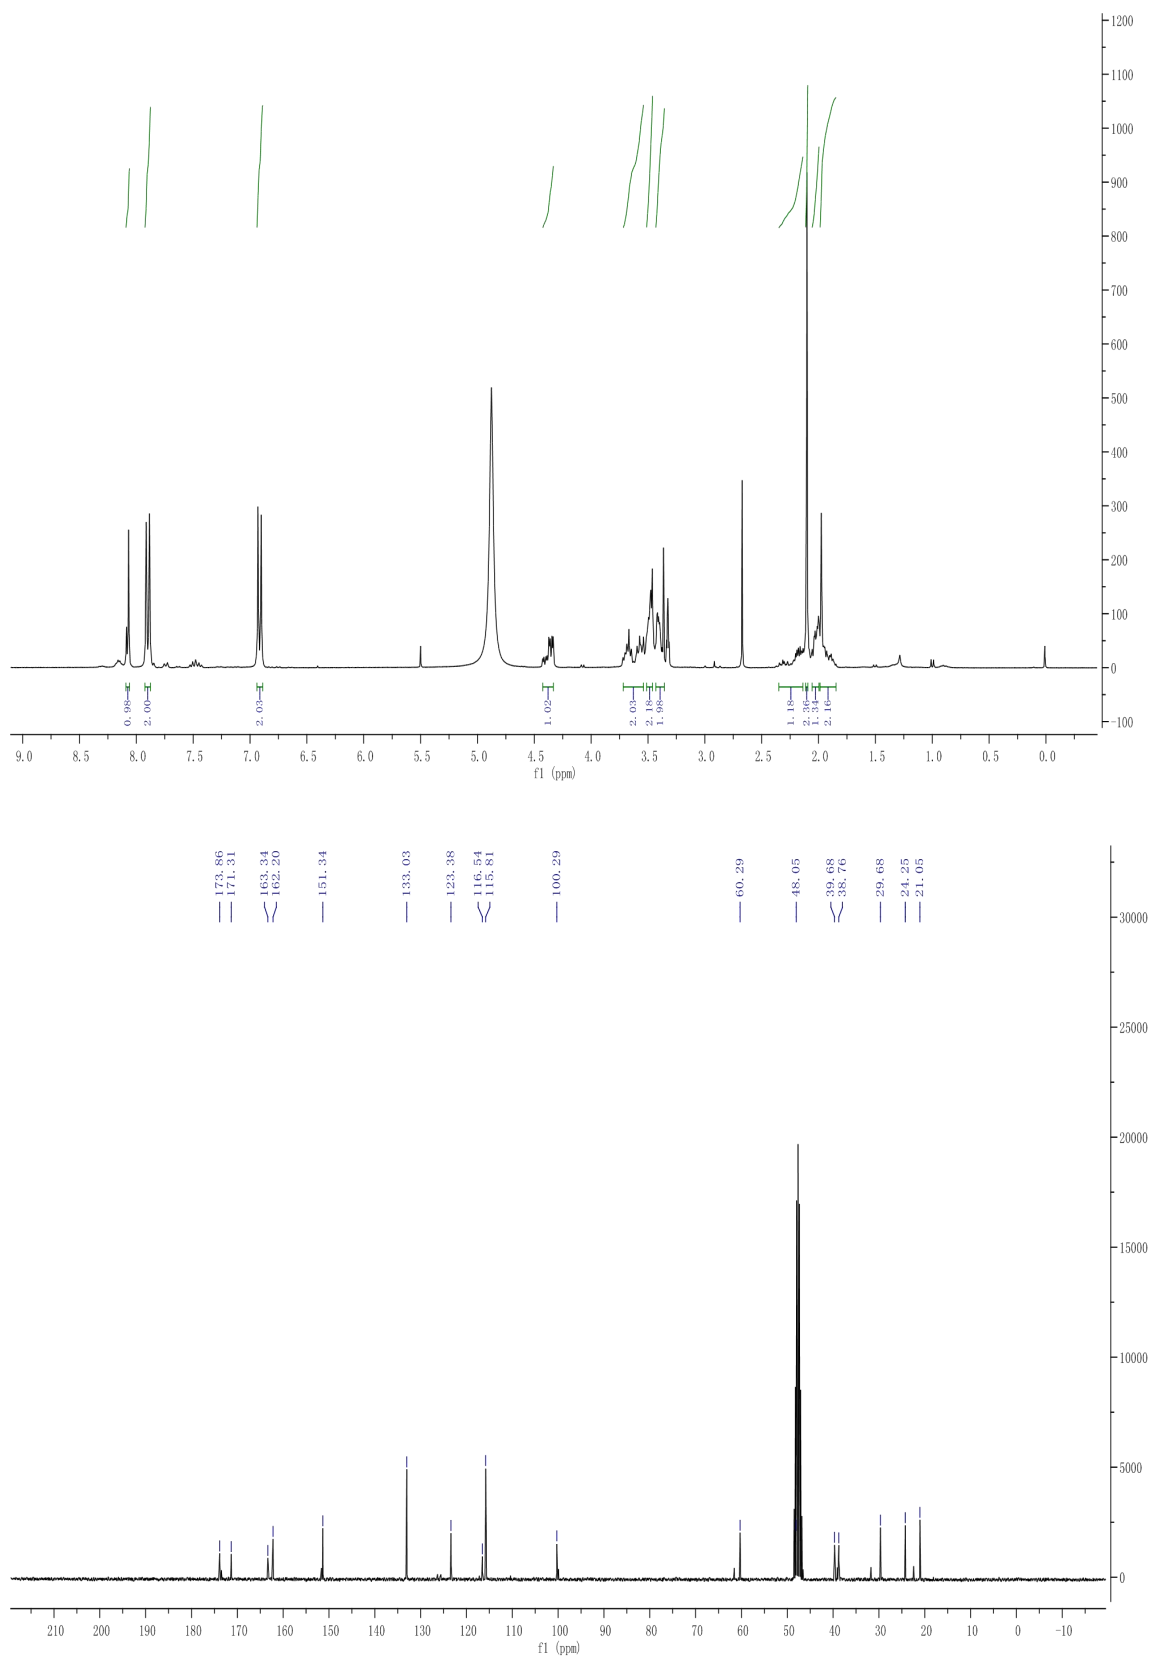

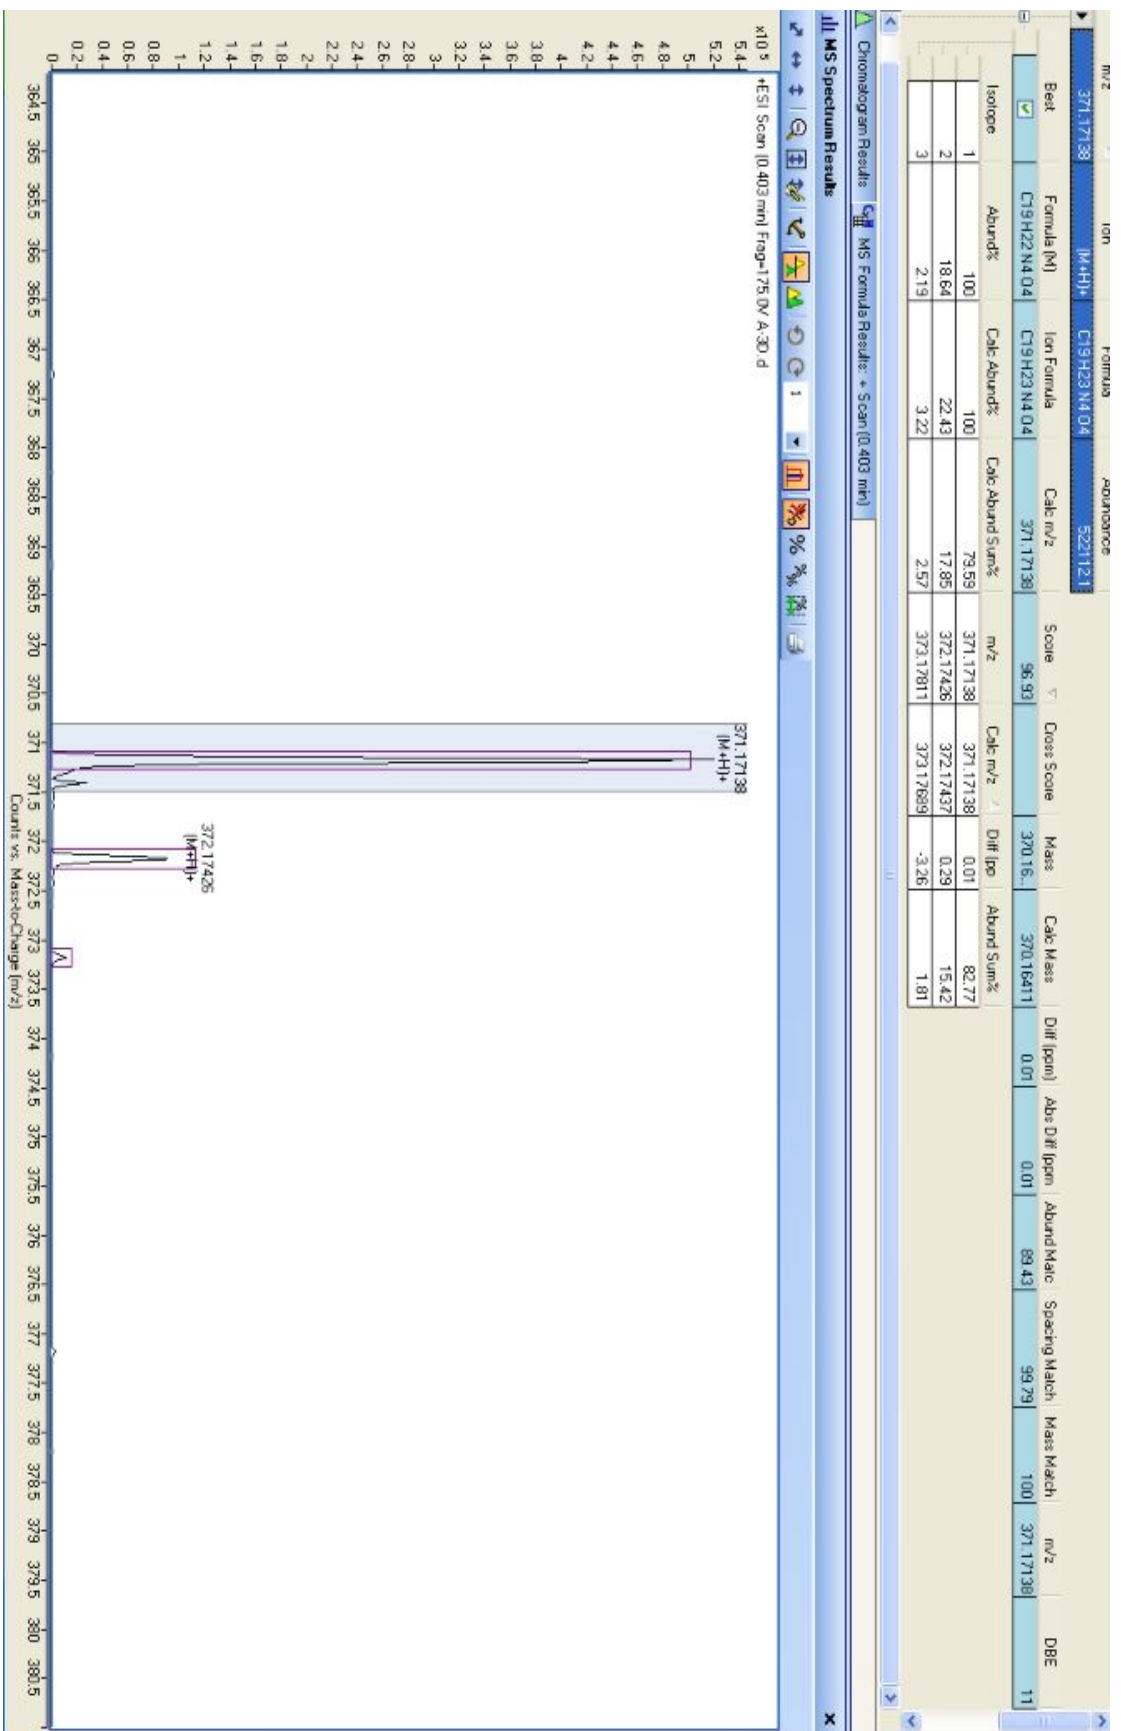

**5b** ( $^1\text{H}$  NMR,  $^{13}\text{C}$  NMR, HRMS)

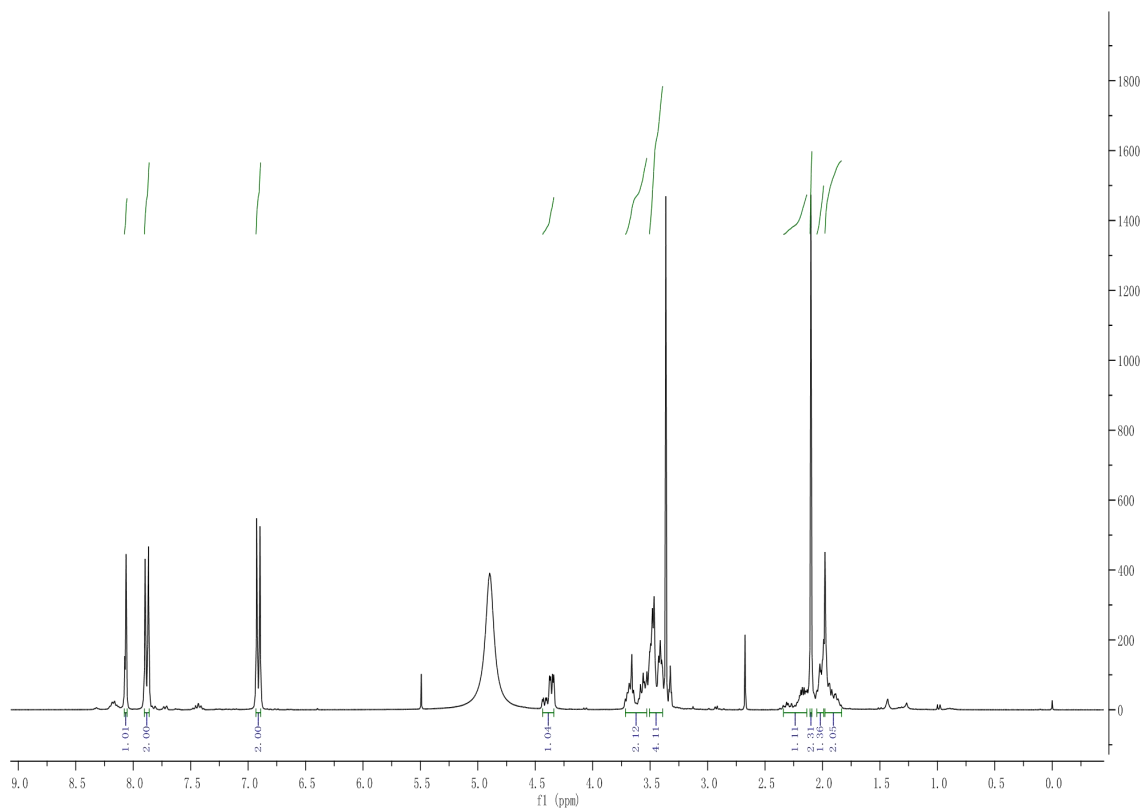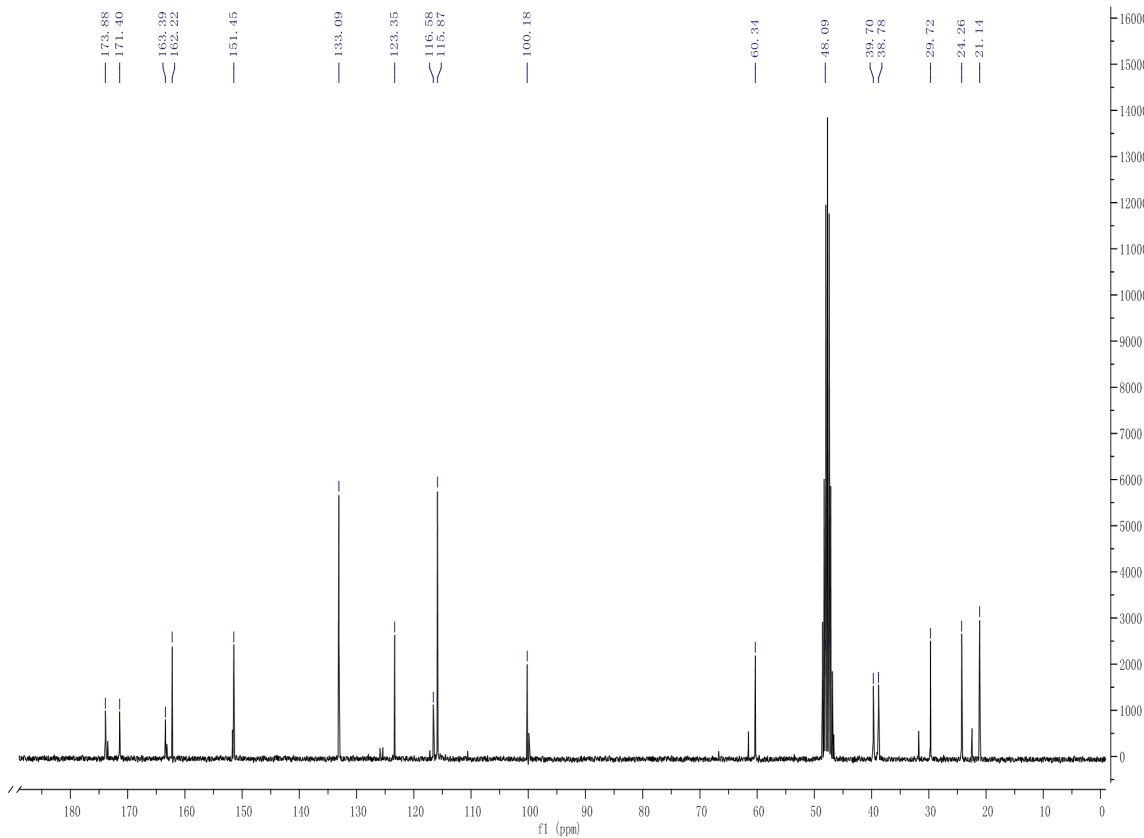

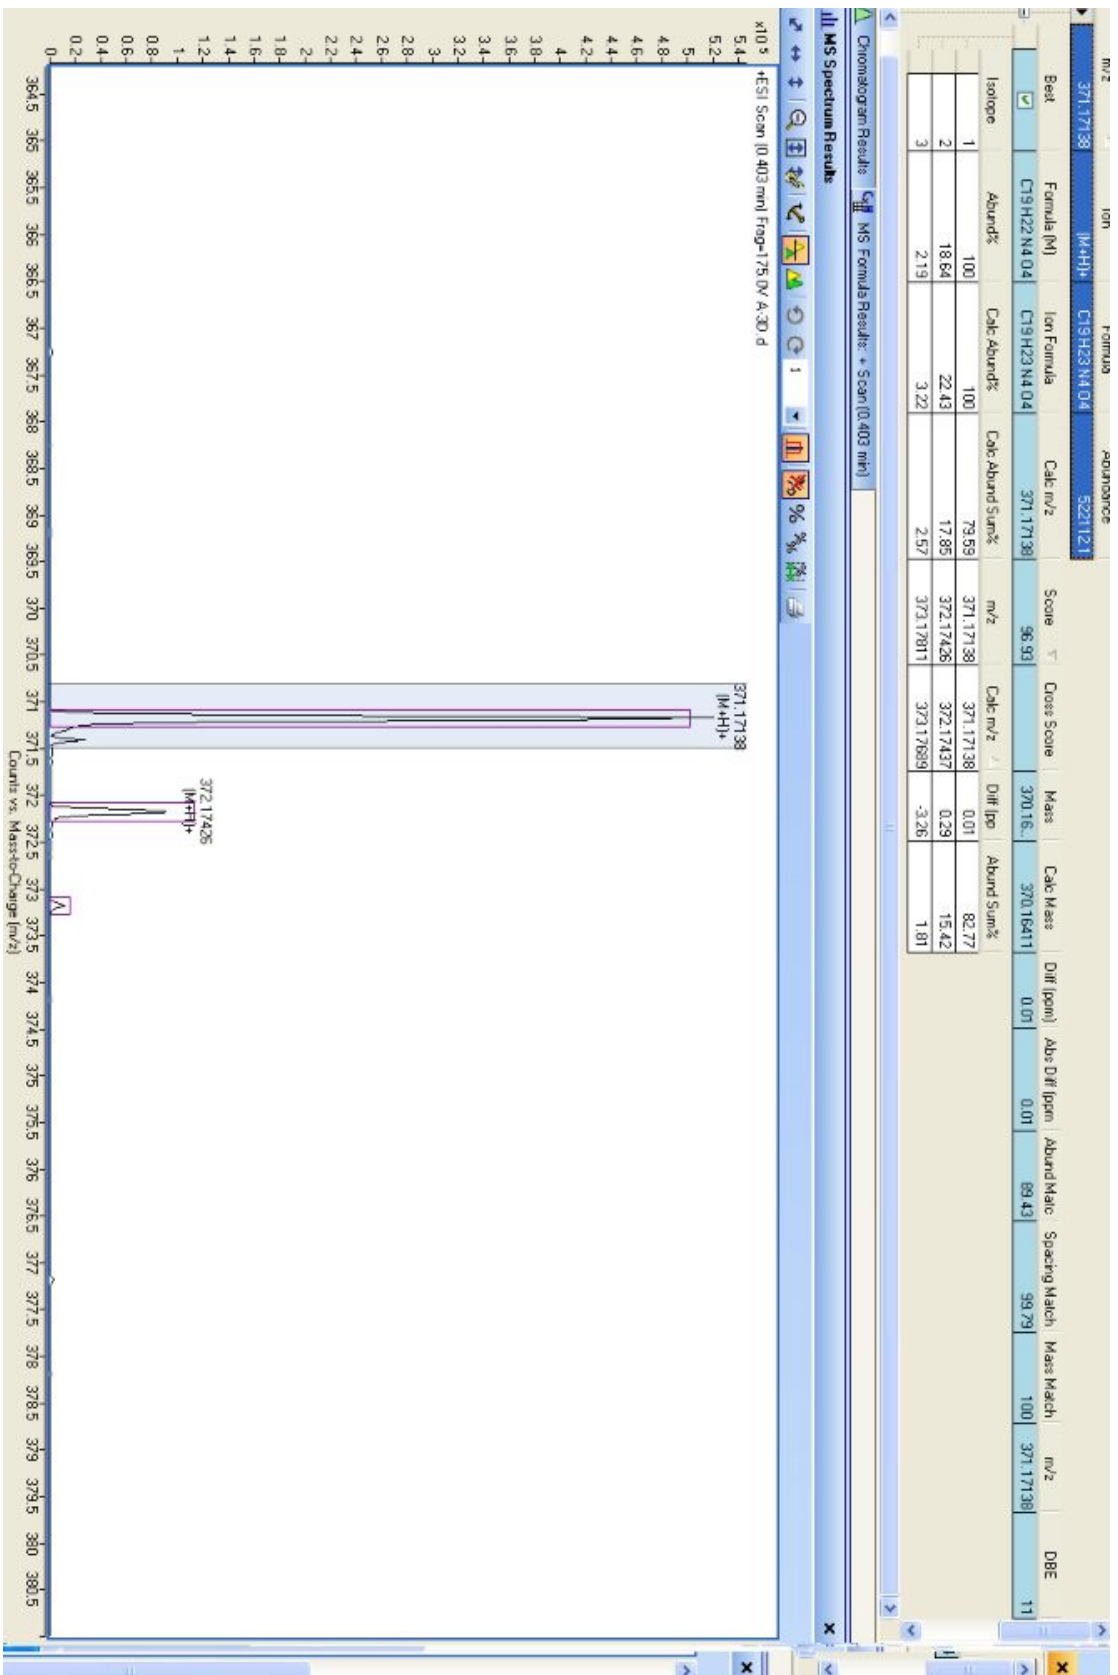



**5c** ( $^1\text{H}$  NMR,  $^{13}\text{C}$  NMR, HRMS)

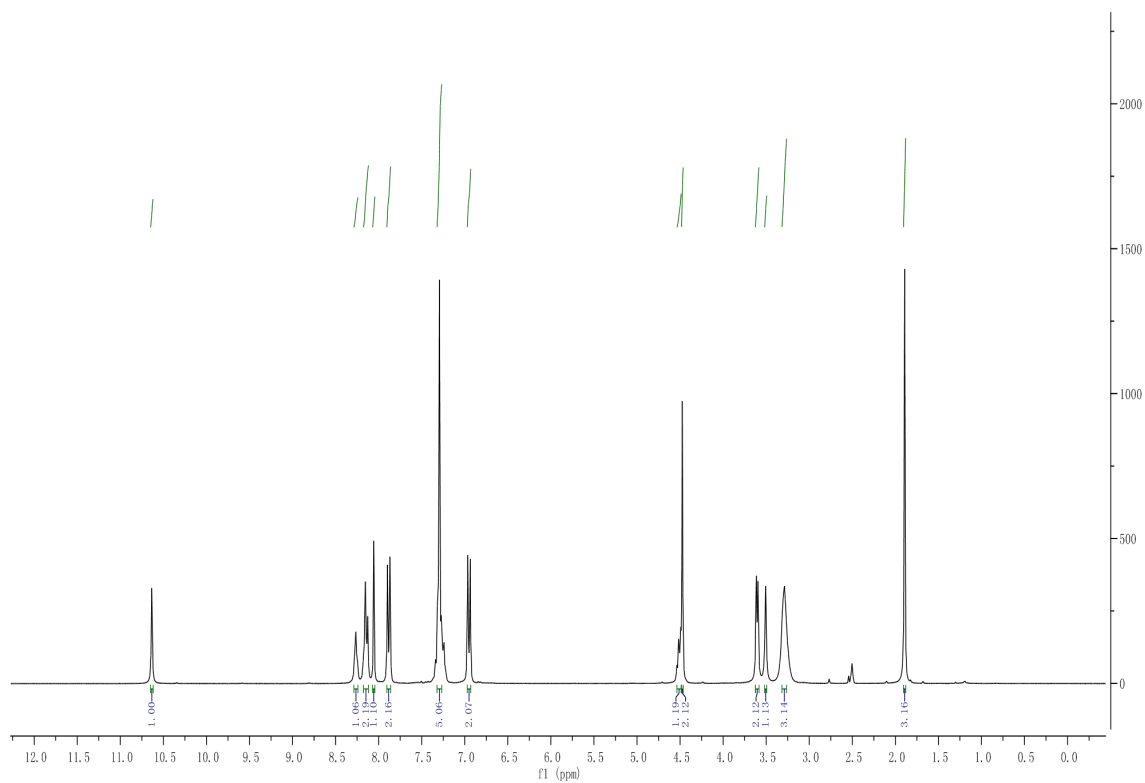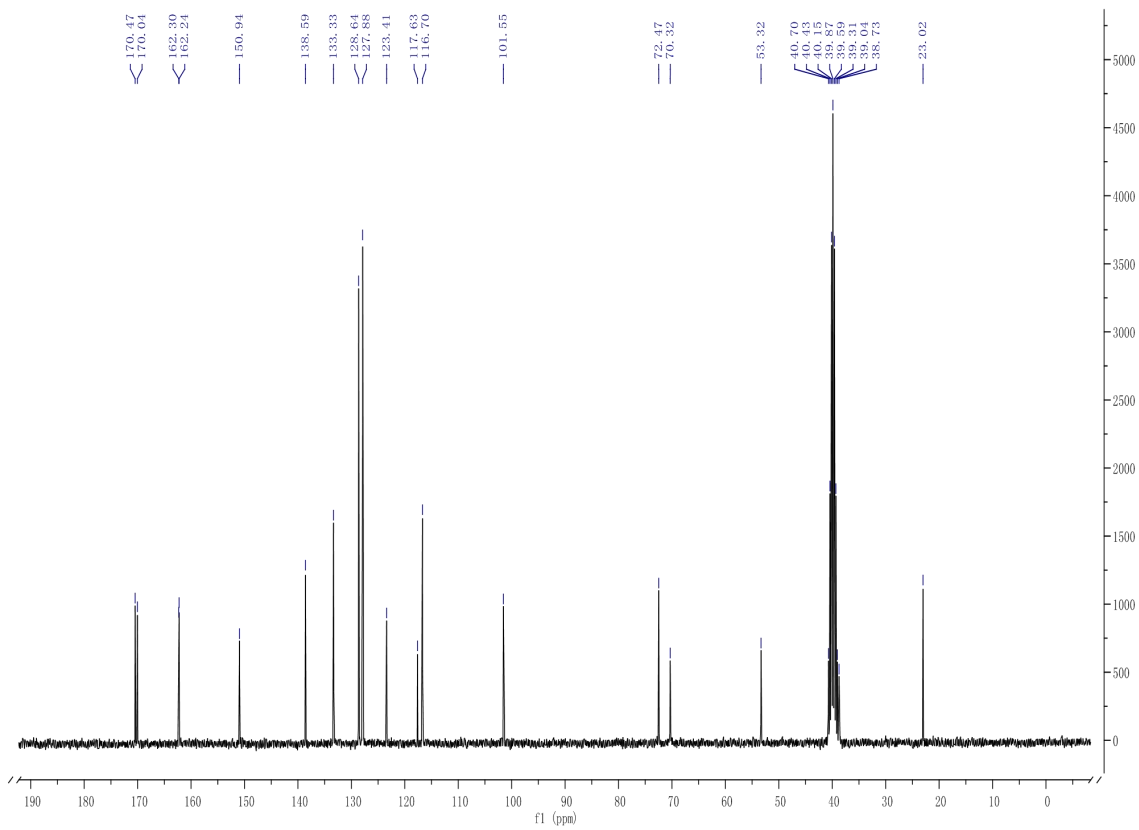

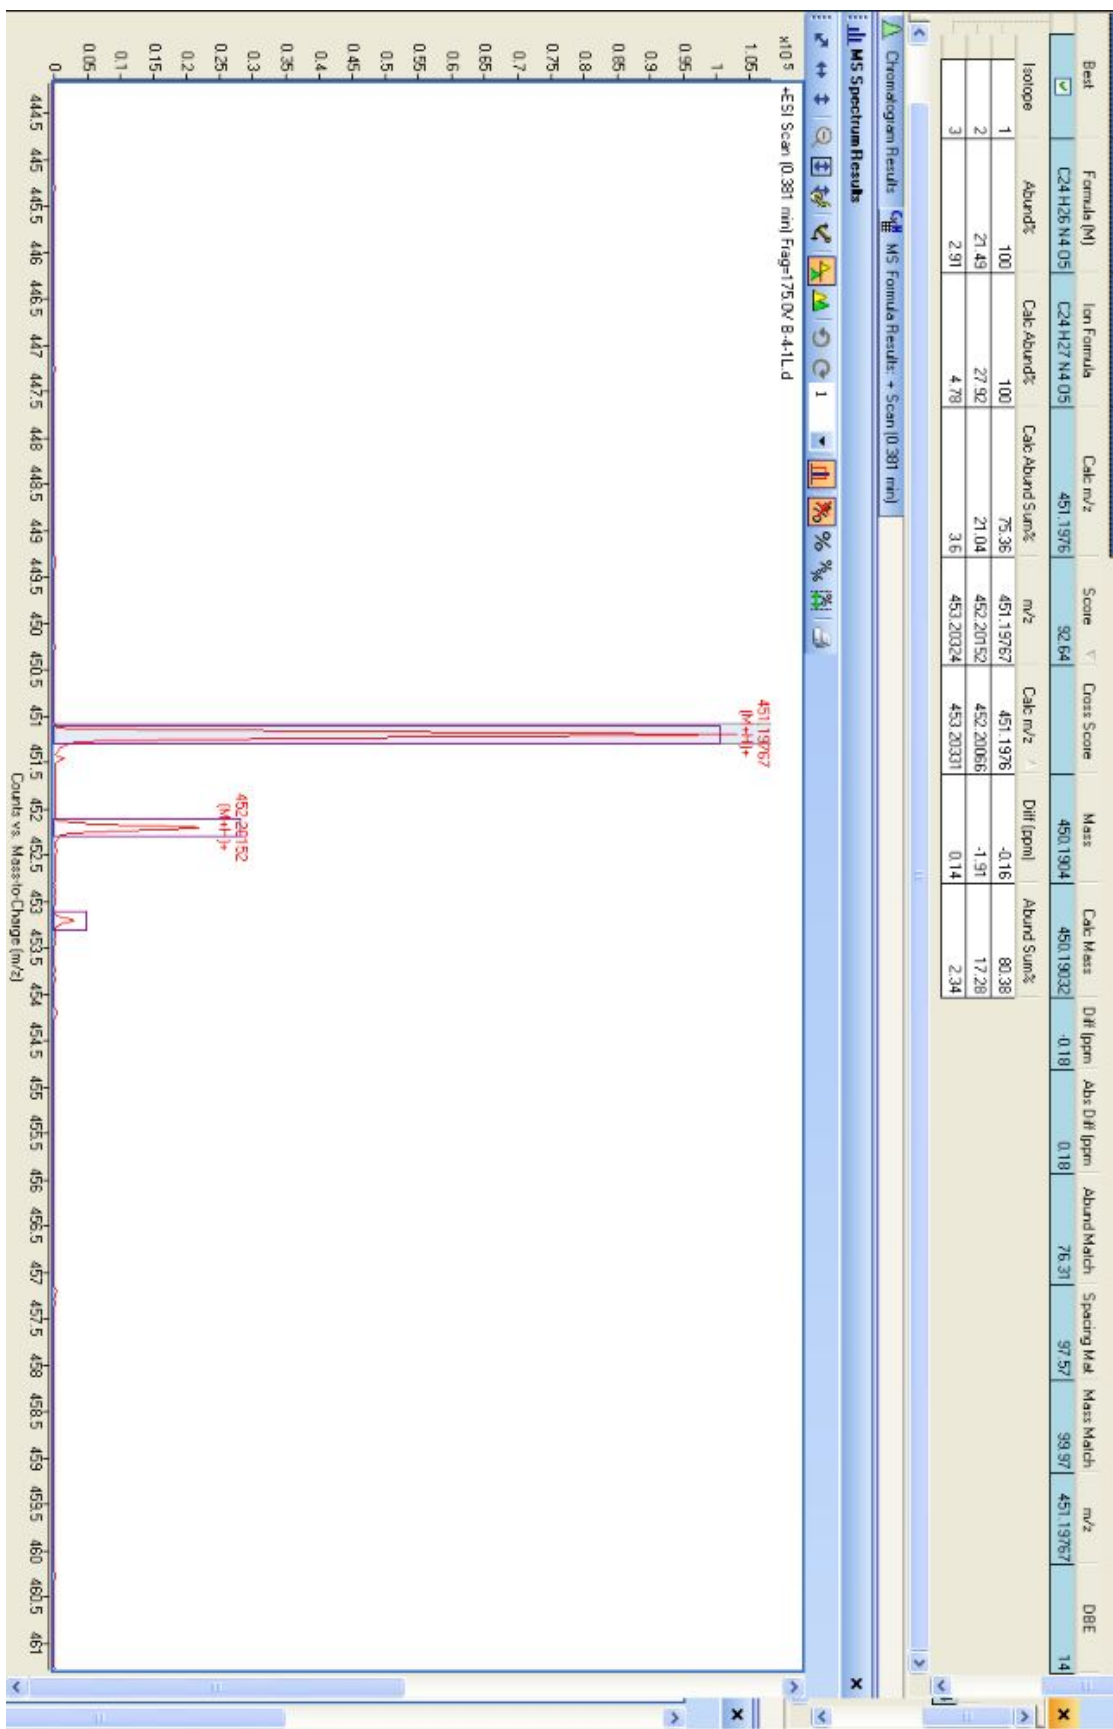

**5d** ( $^1\text{H}$  NMR,  $^{13}\text{C}$  NMR, HRMS)

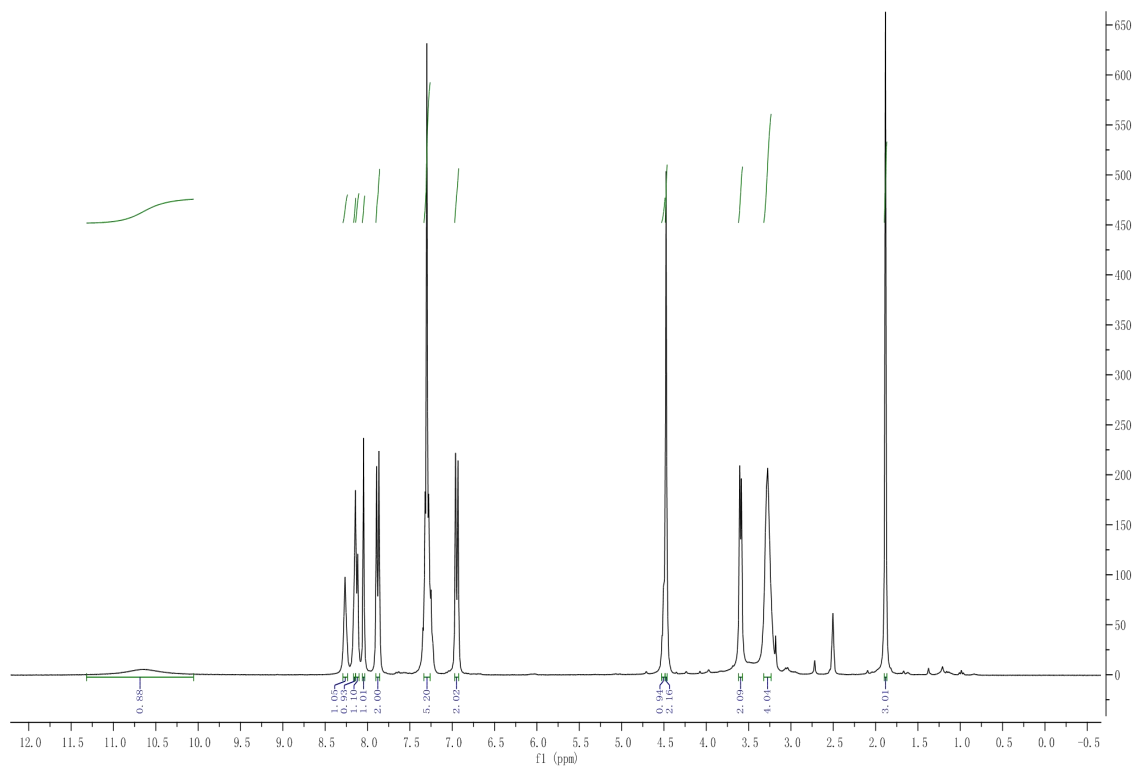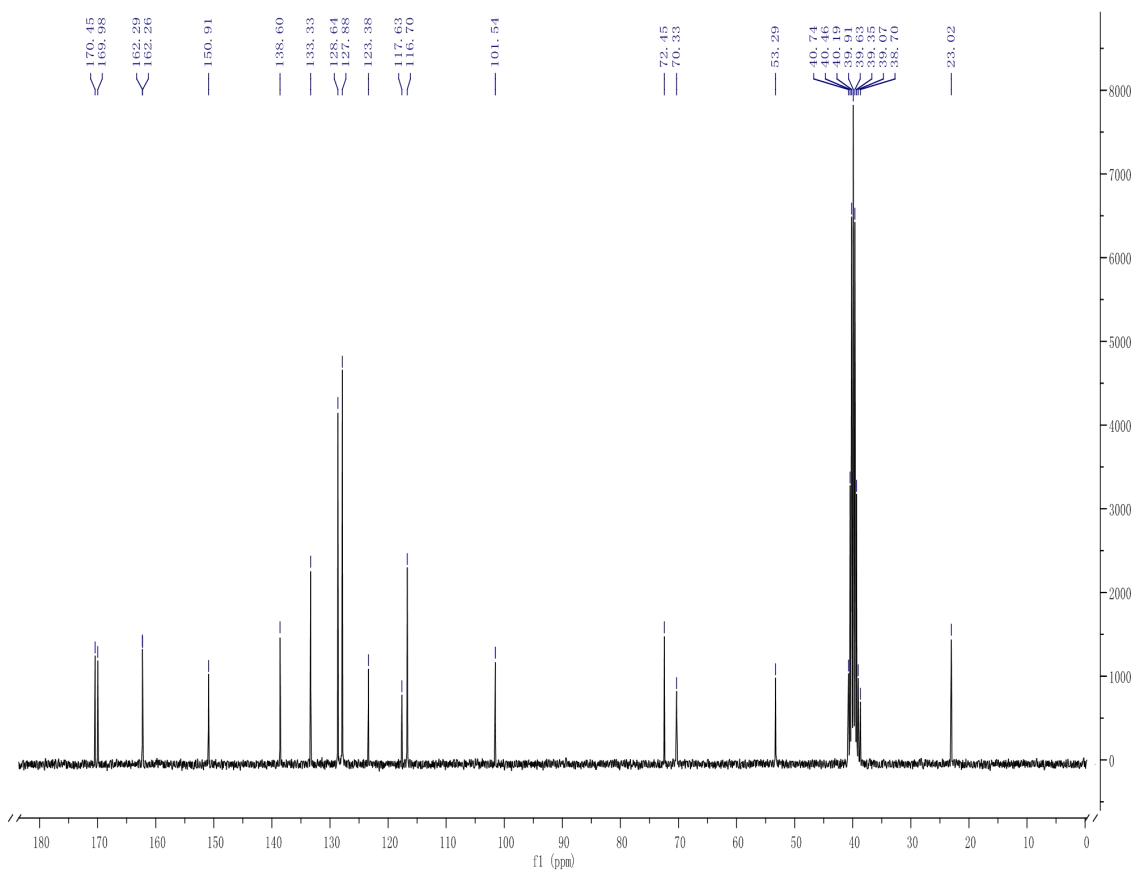



5e (<sup>1</sup>H NMR, <sup>13</sup>C NMR, HRMS)

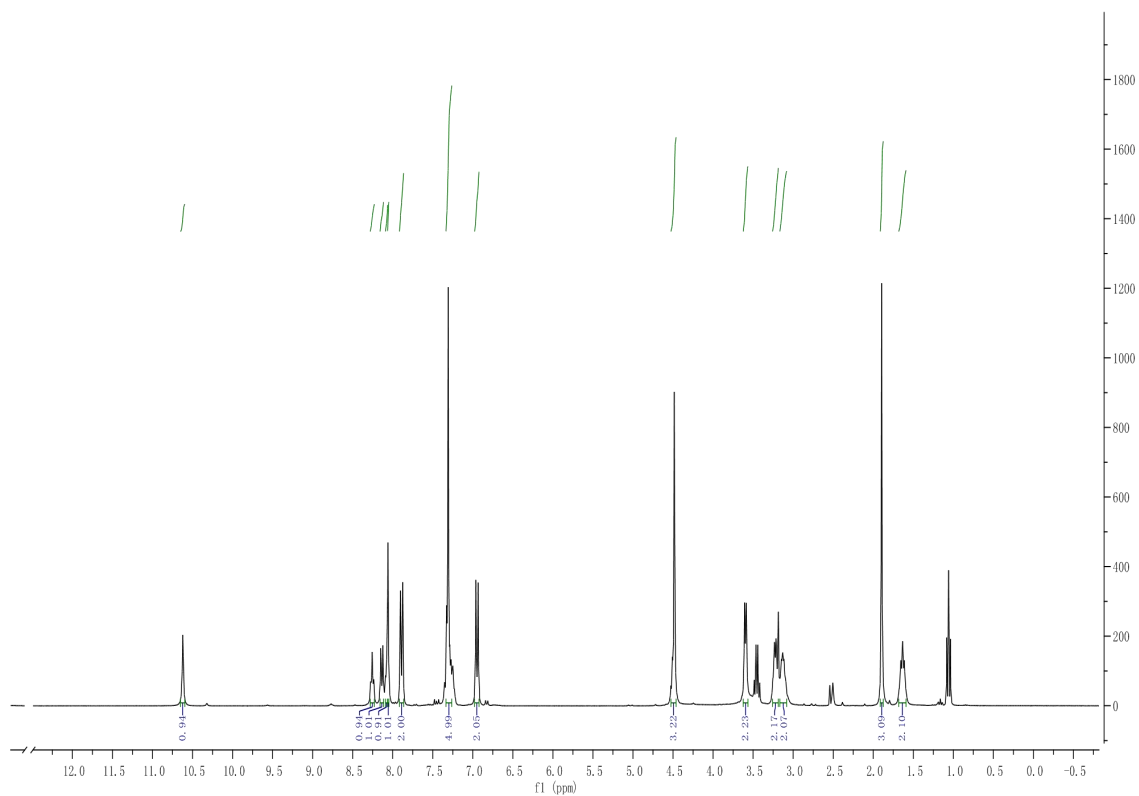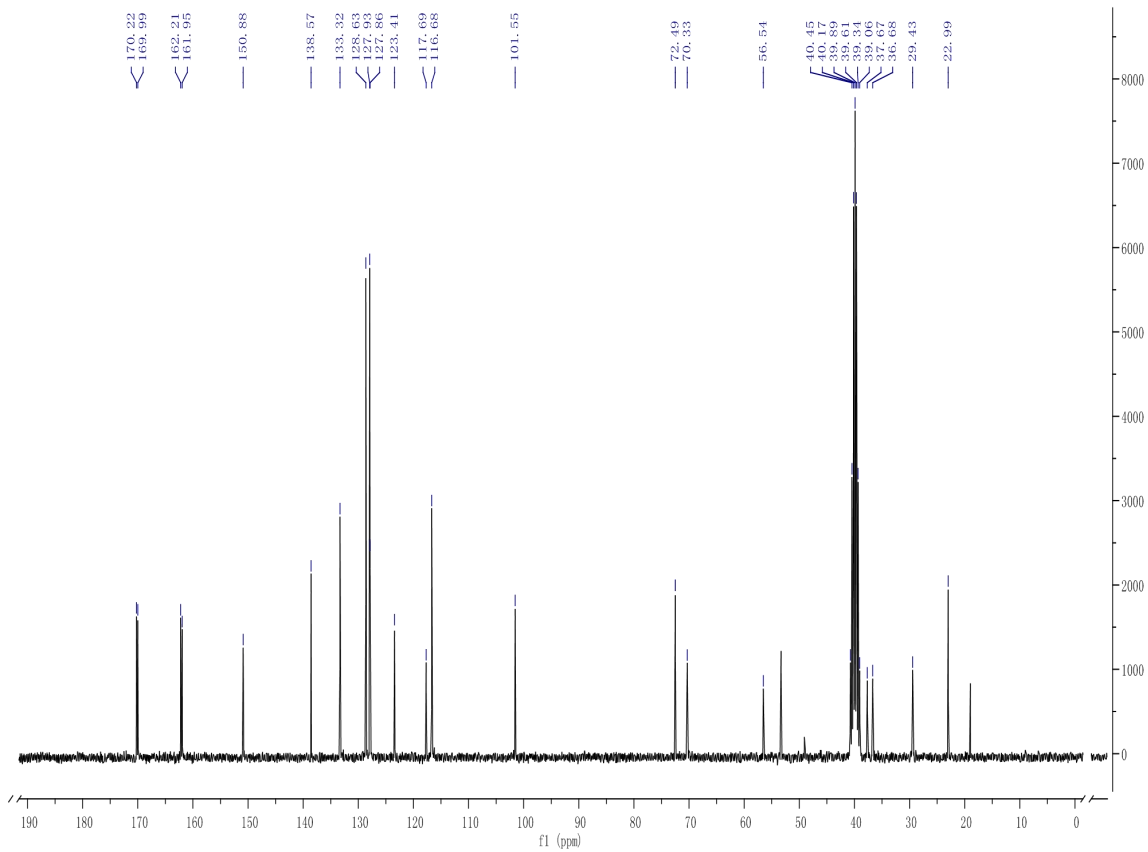

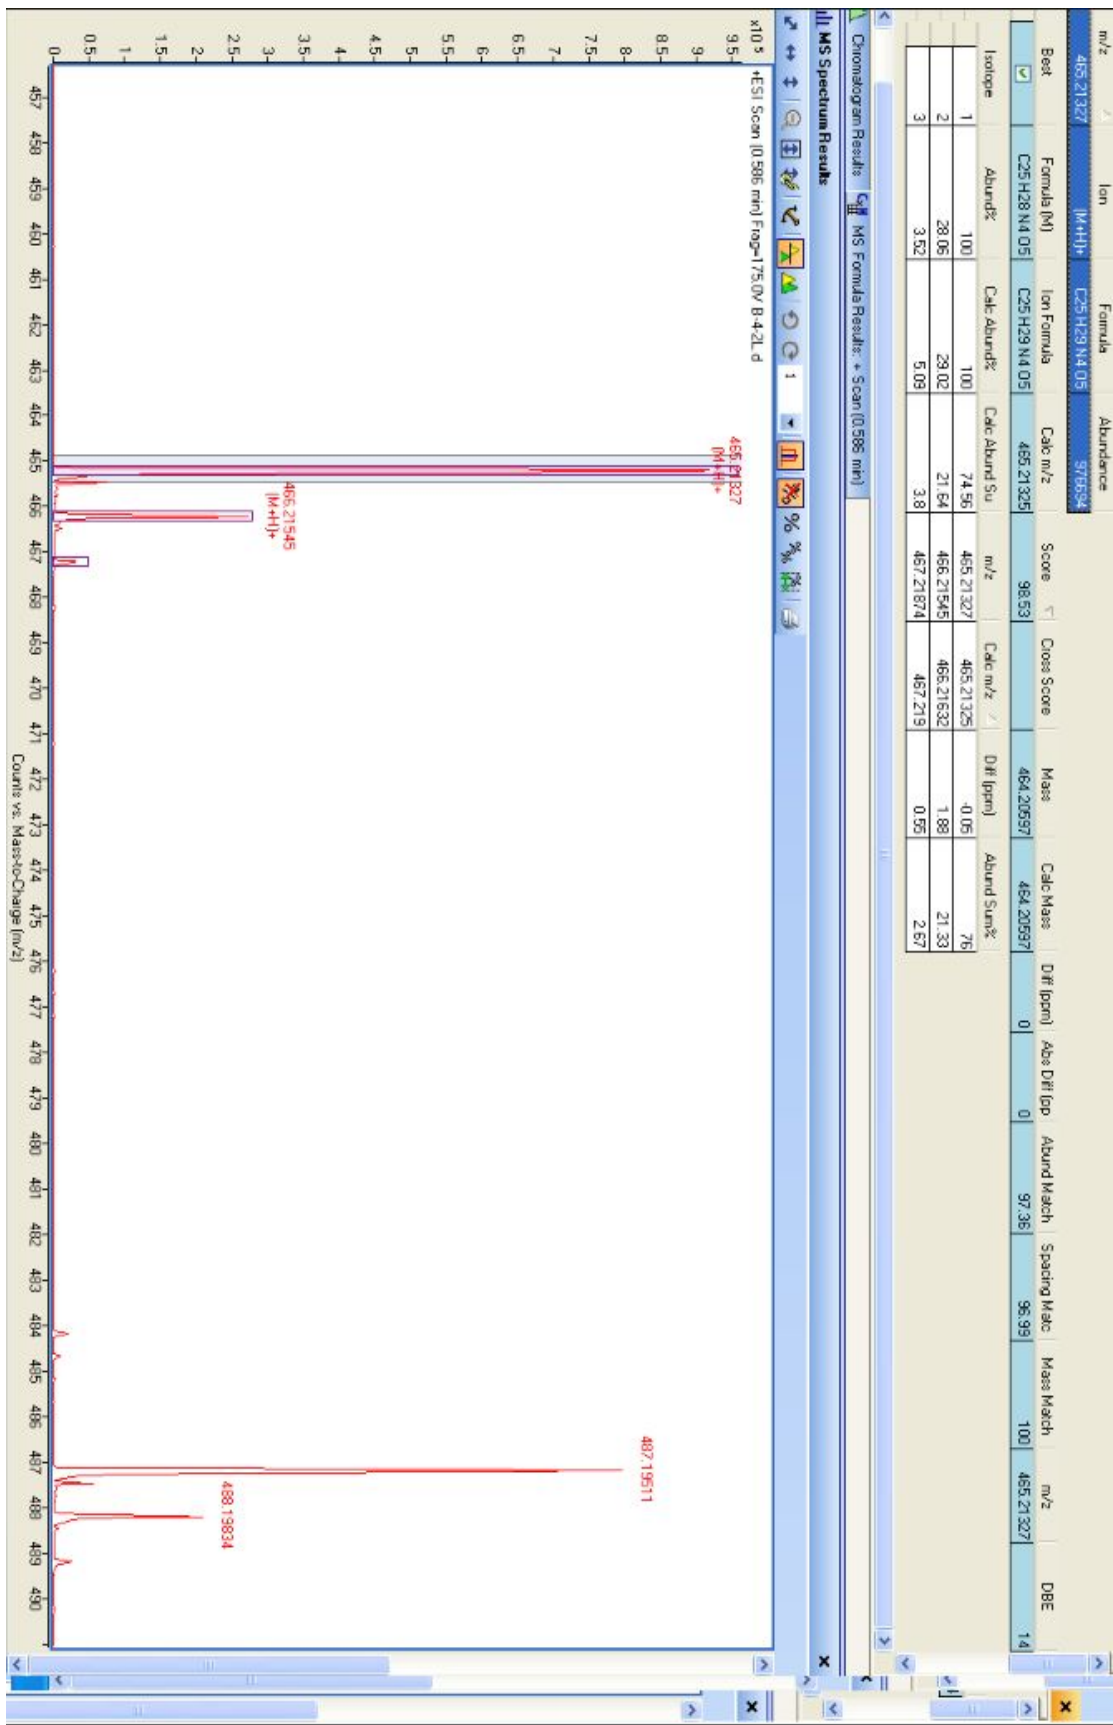

5f (<sup>1</sup>H NMR, <sup>13</sup>C NMR, HRMS)

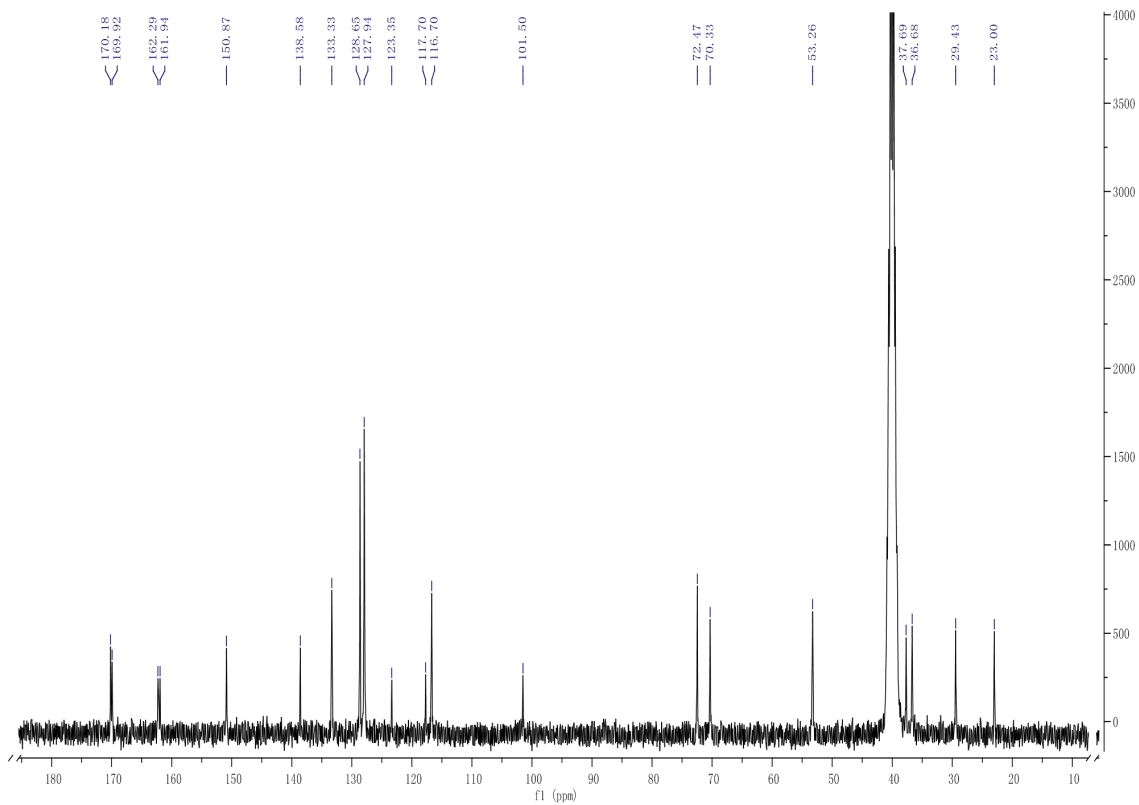

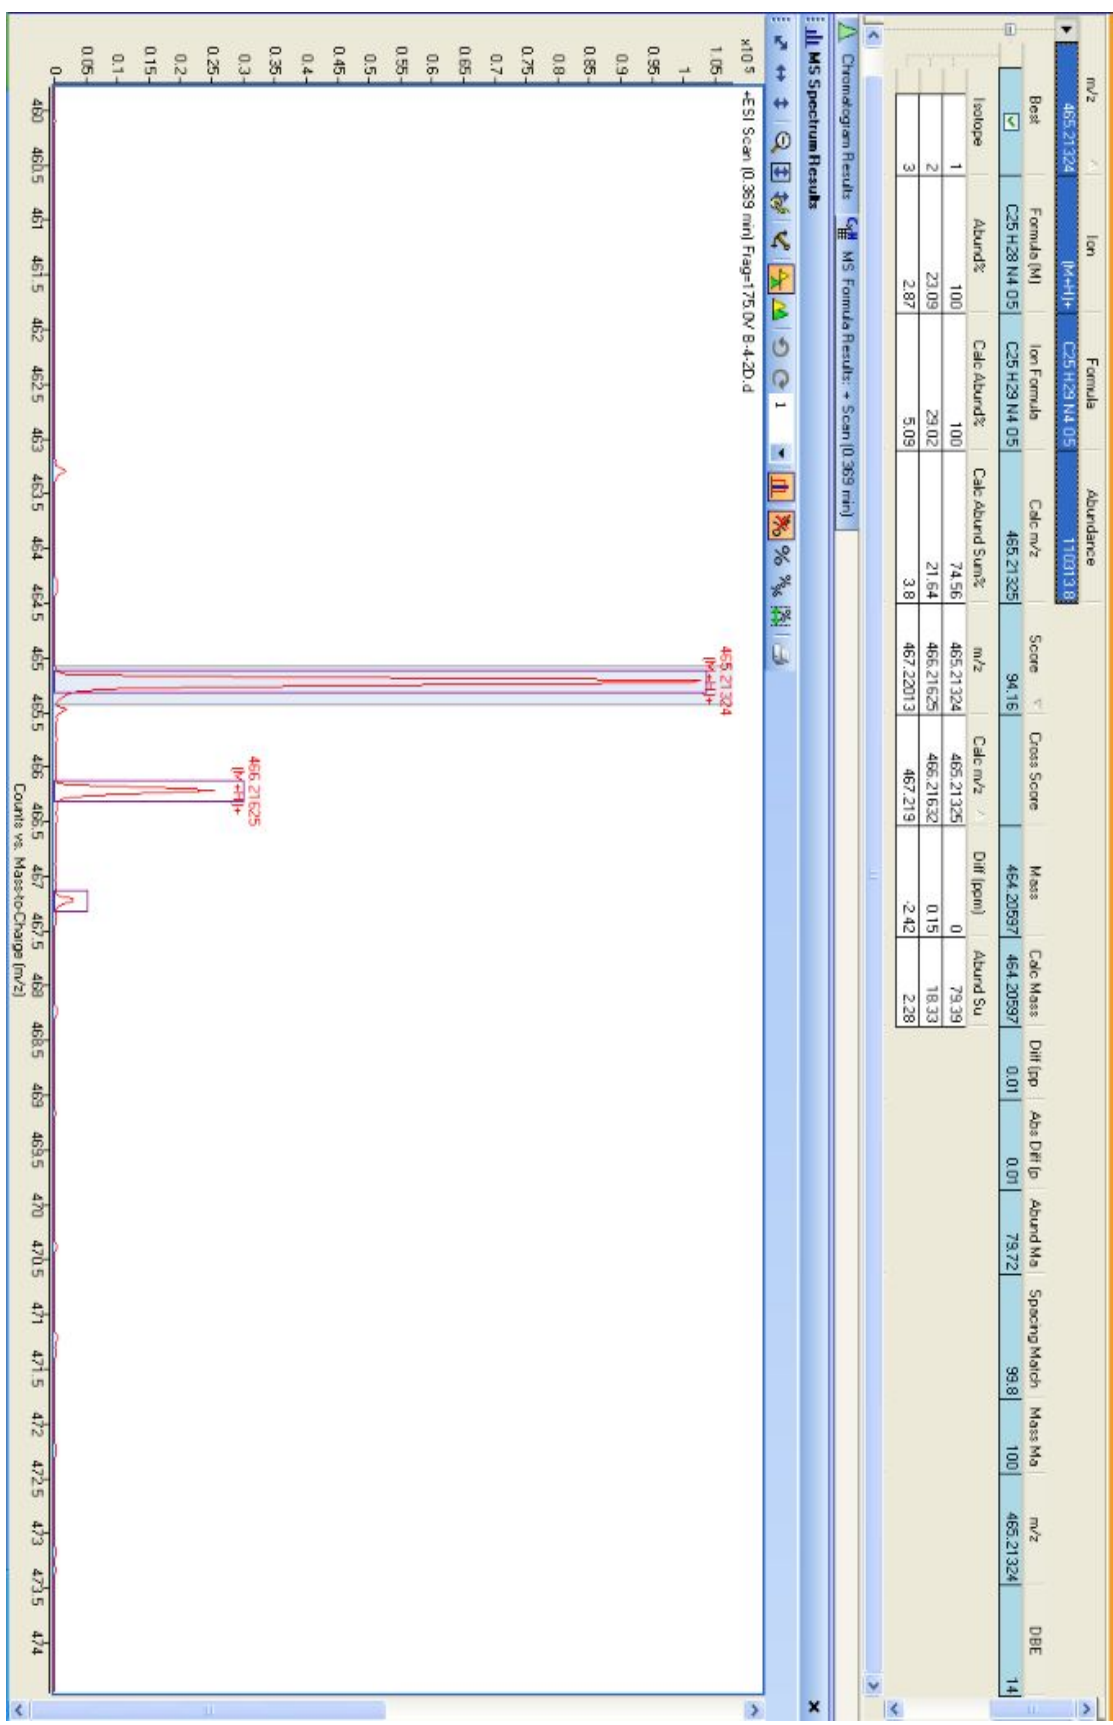



**5g** ( $^1\text{H}$  NMR,  $^{13}\text{C}$  NMR, HRMS)

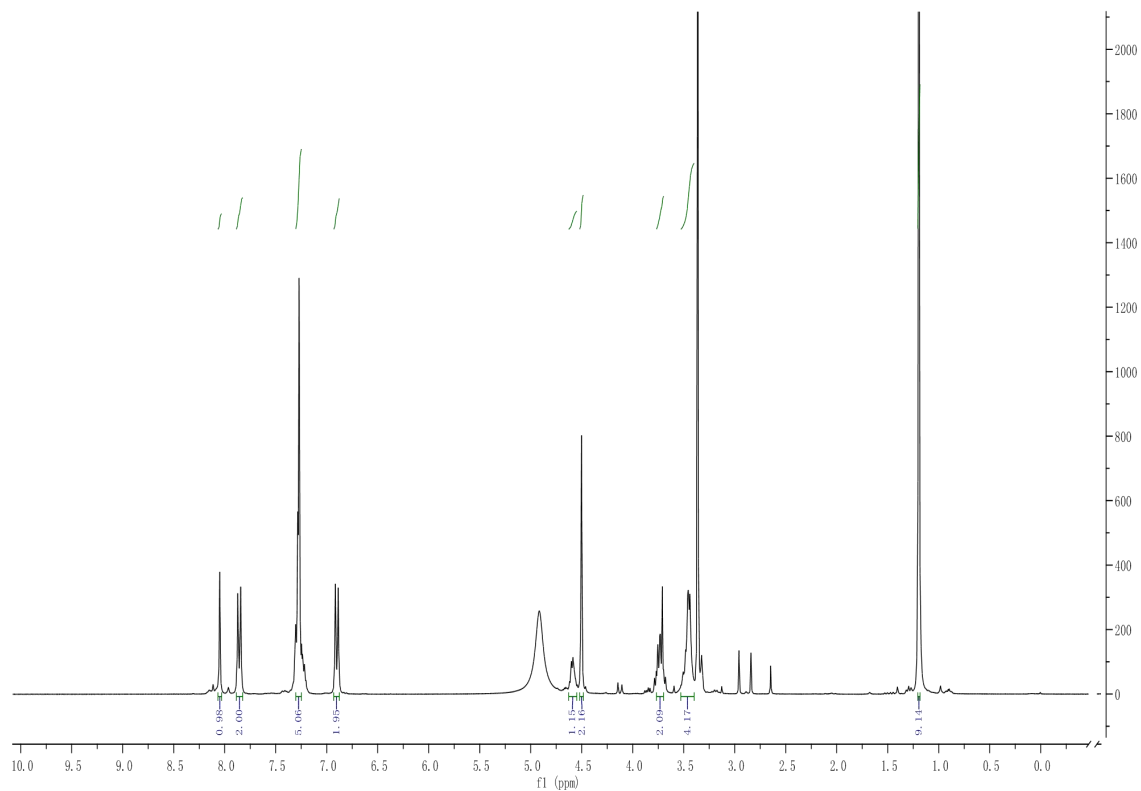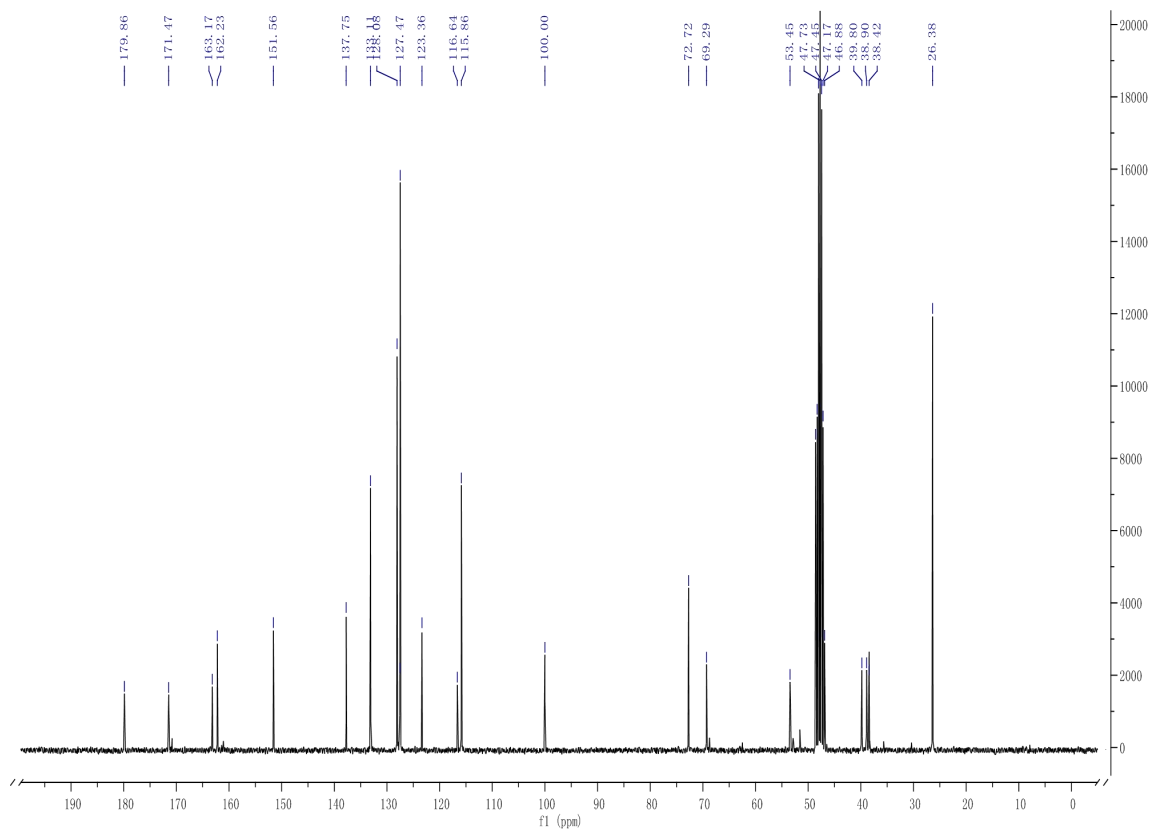

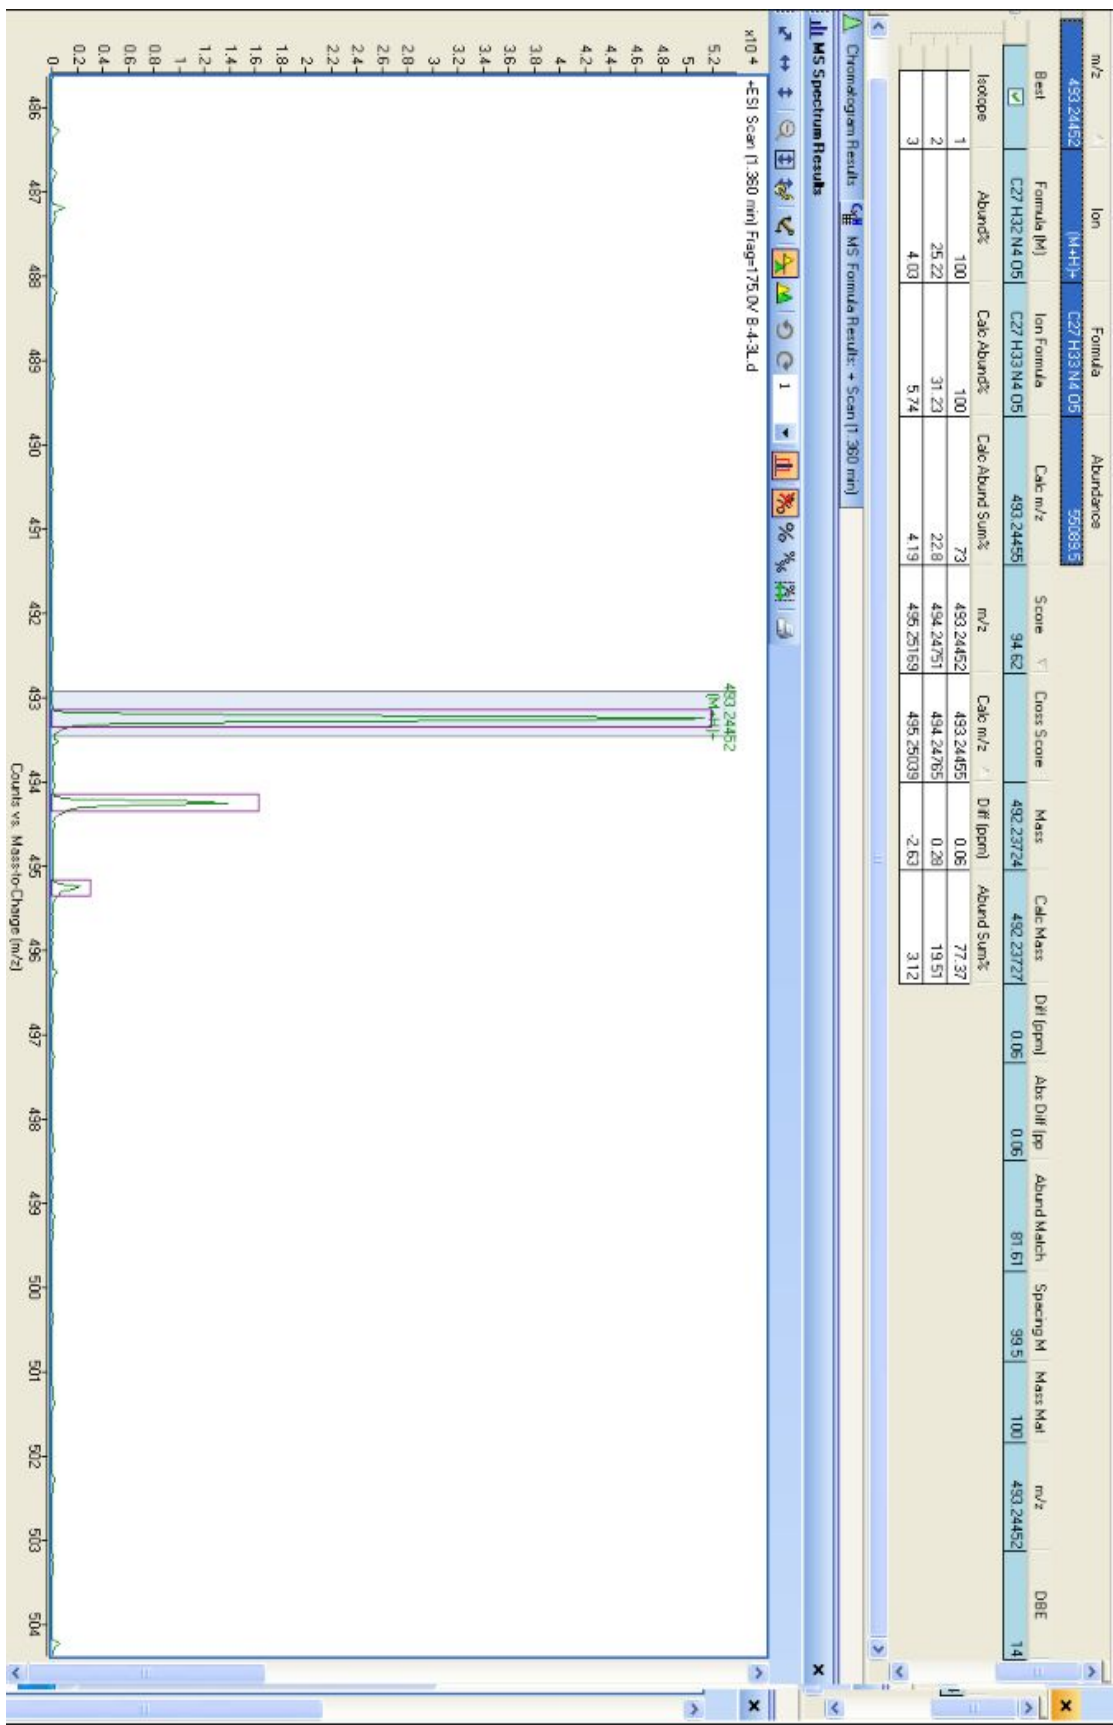

**5h** ( $^1\text{H}$  NMR,  $^{13}\text{C}$  NMR, HRMS)

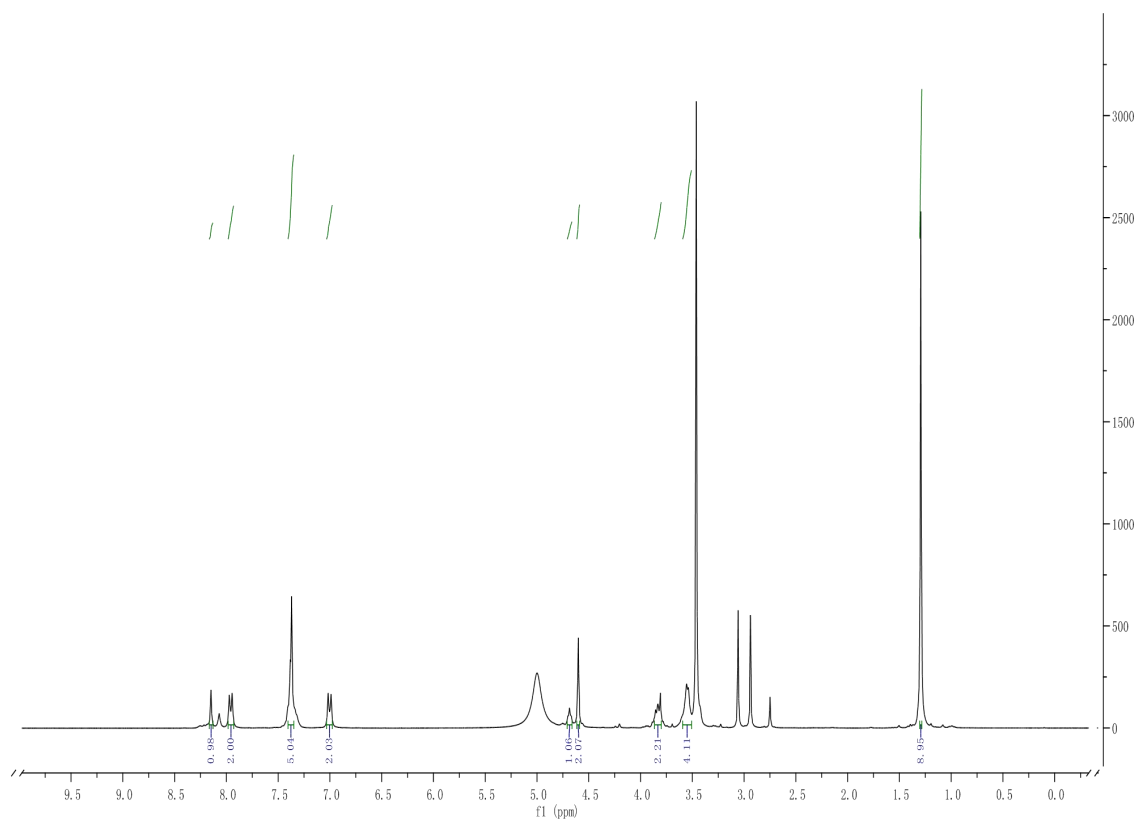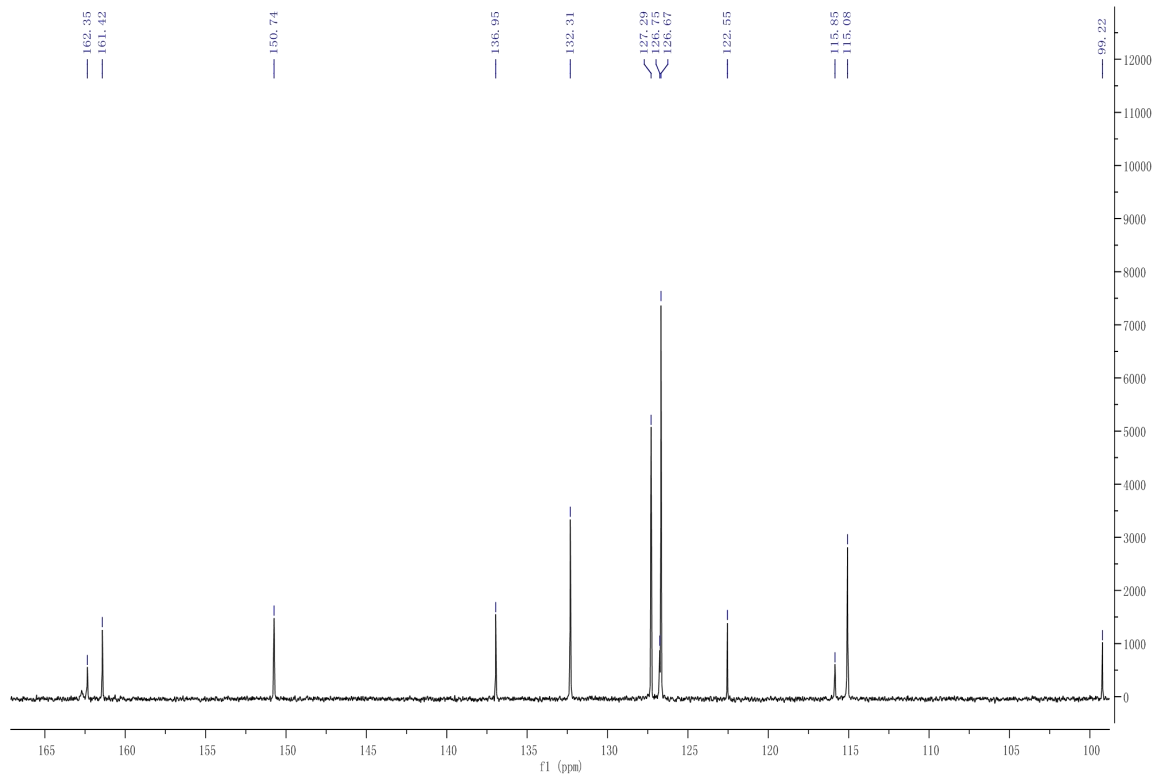

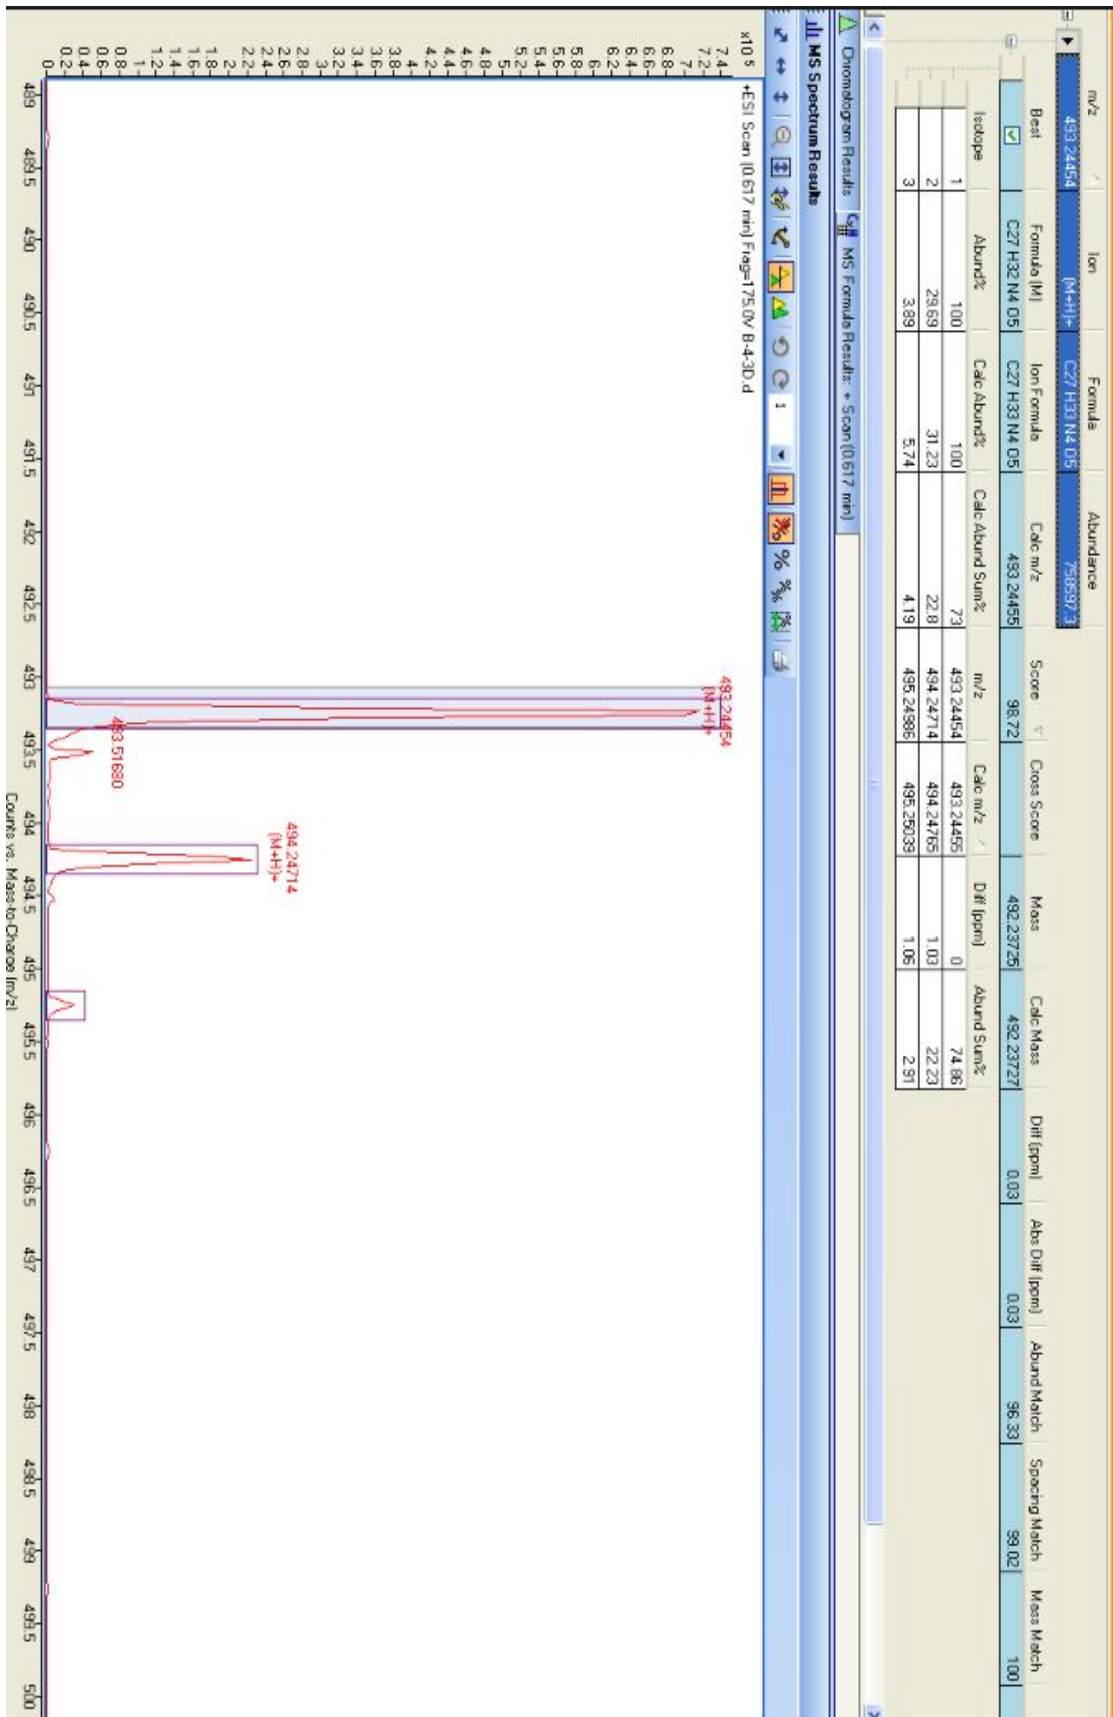

5i (<sup>1</sup>H NMR, <sup>13</sup>C NMR, HRMS)

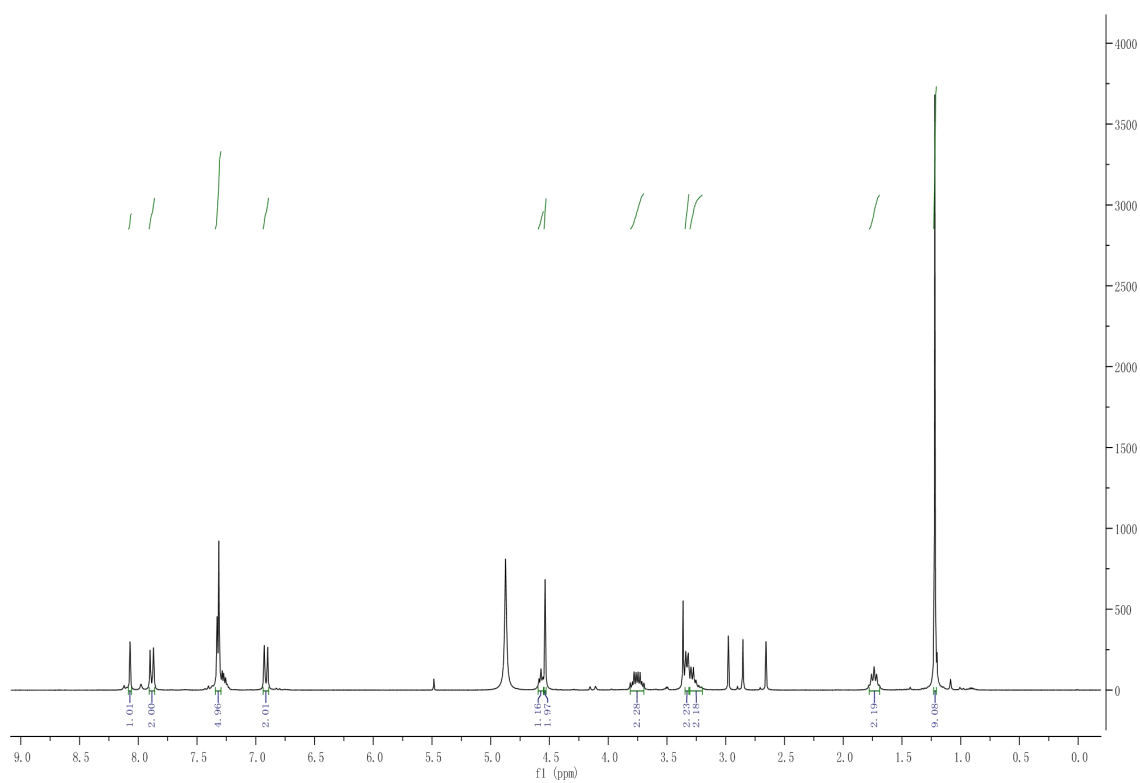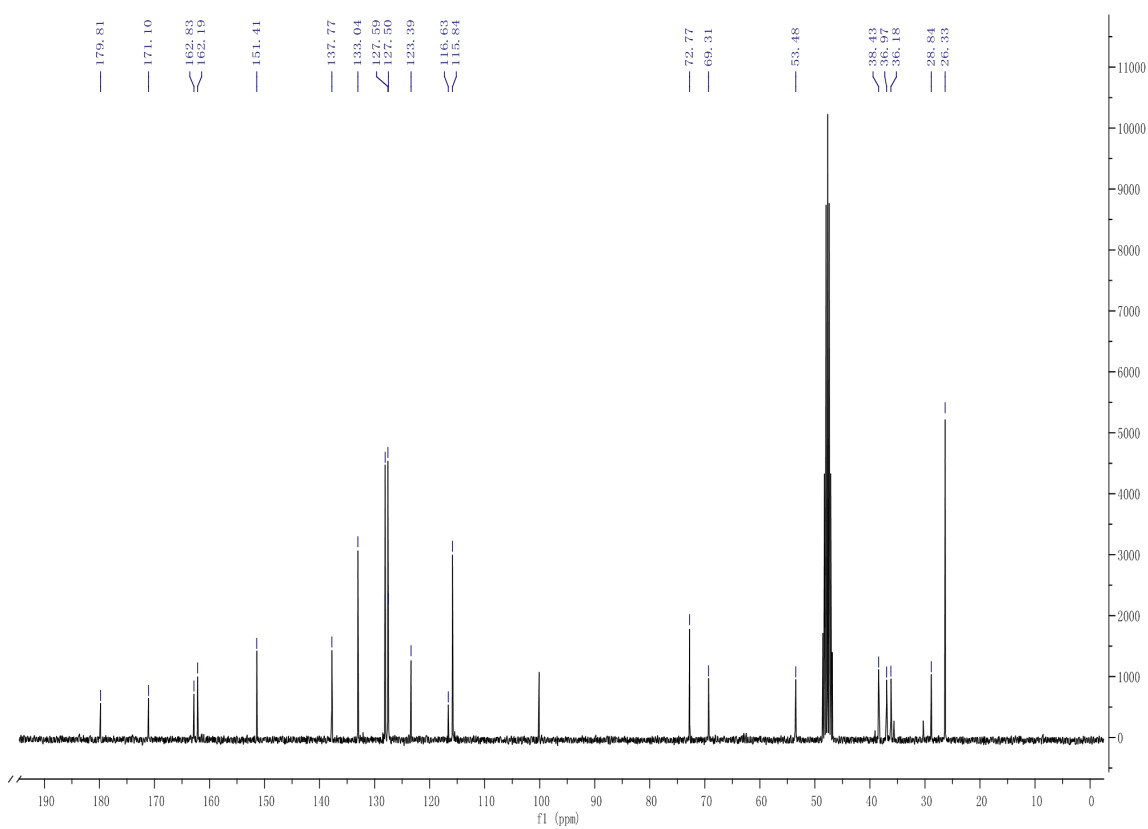

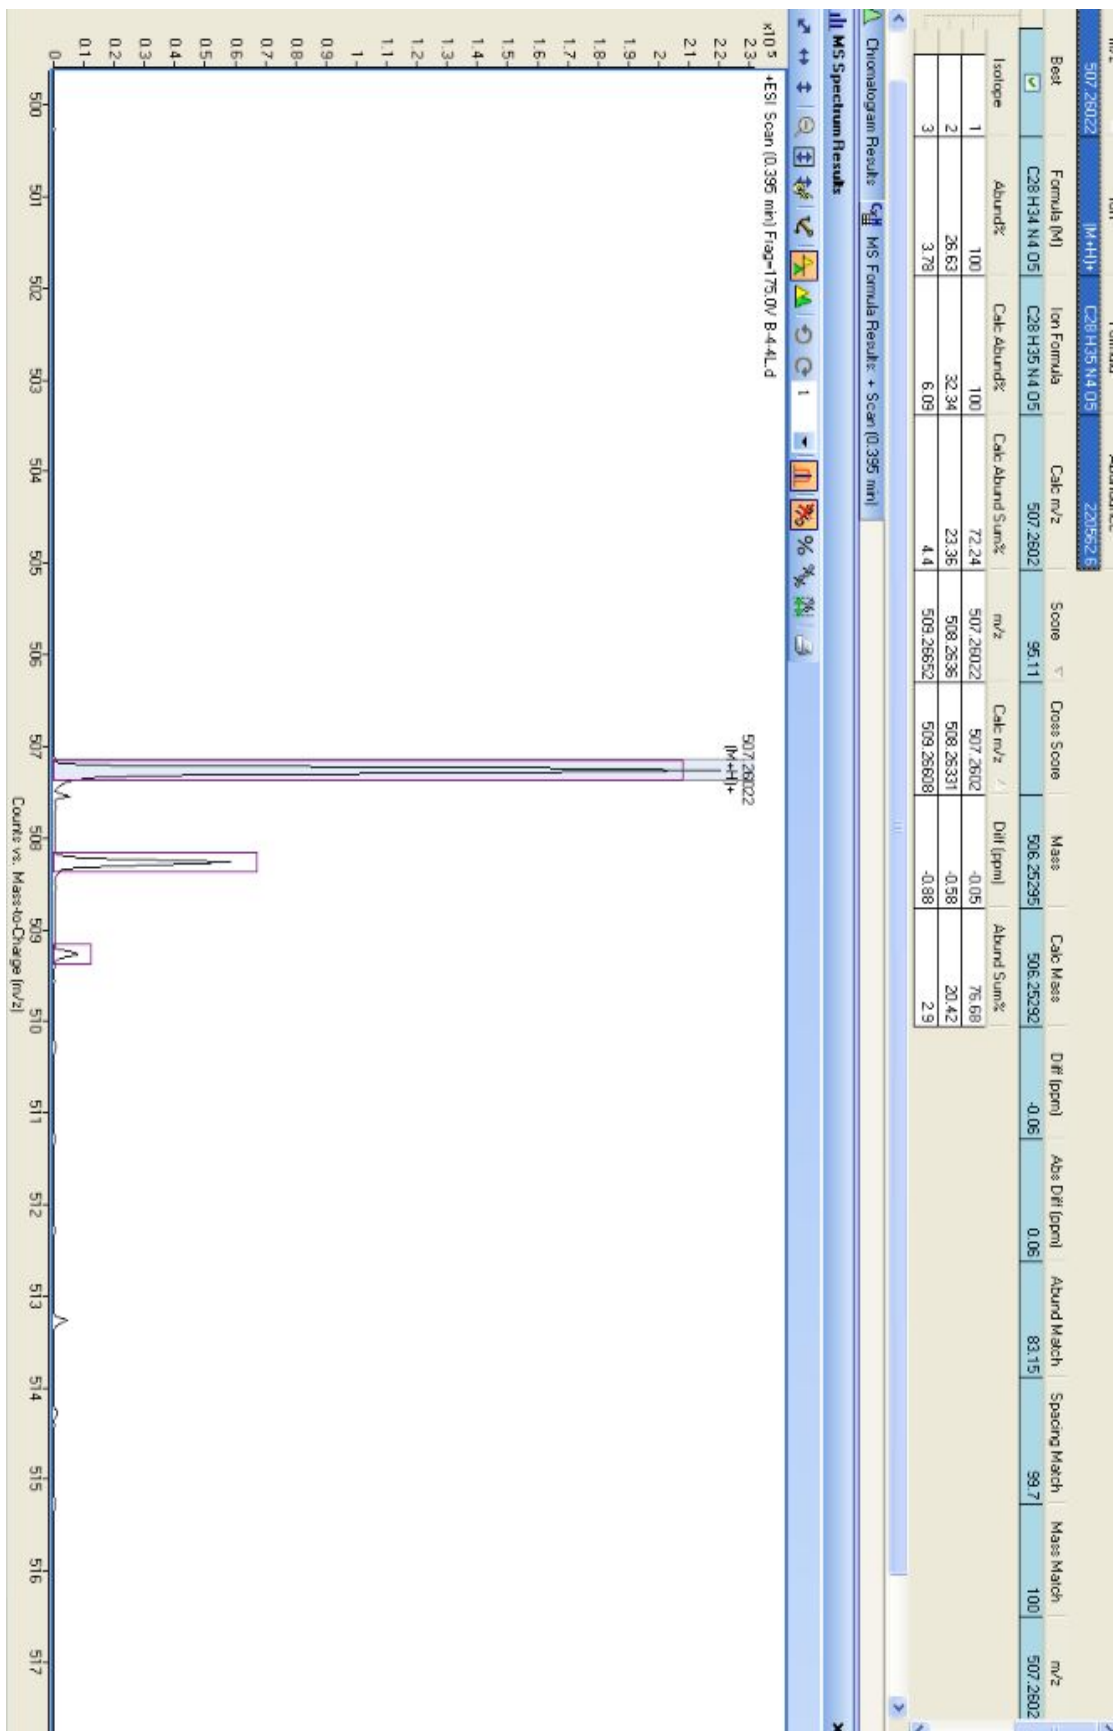

5j (<sup>1</sup>H NMR, <sup>13</sup>C NMR, HRMS)

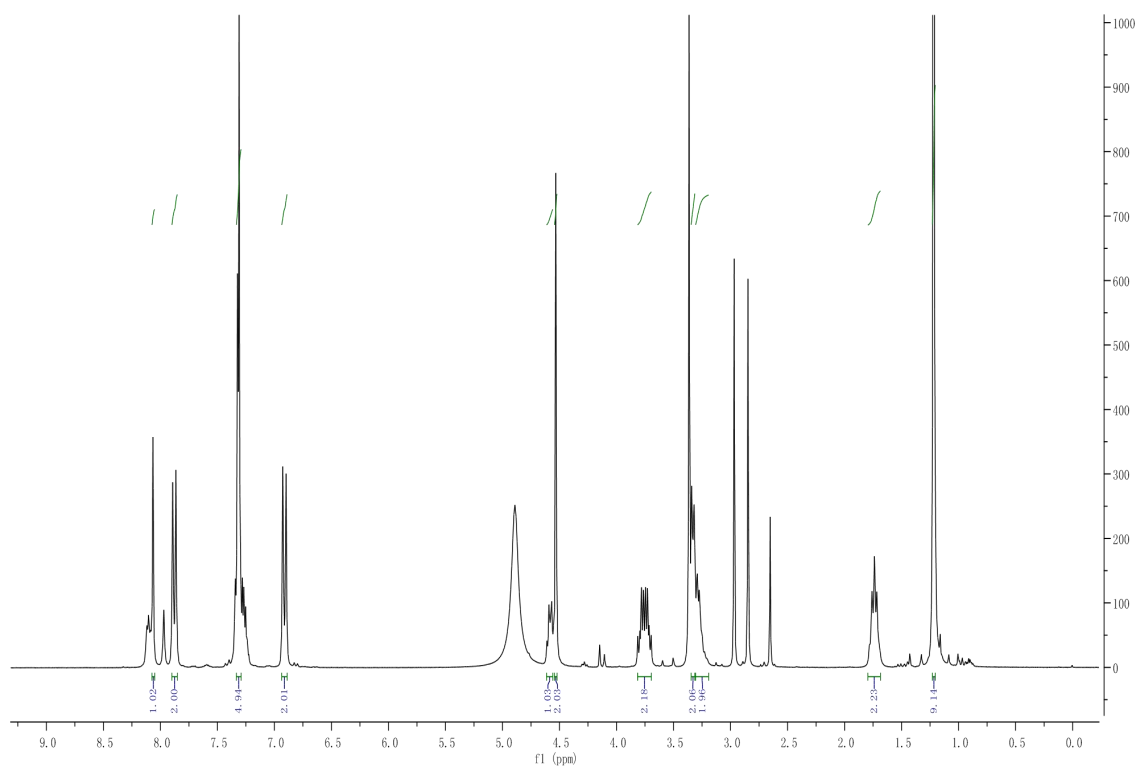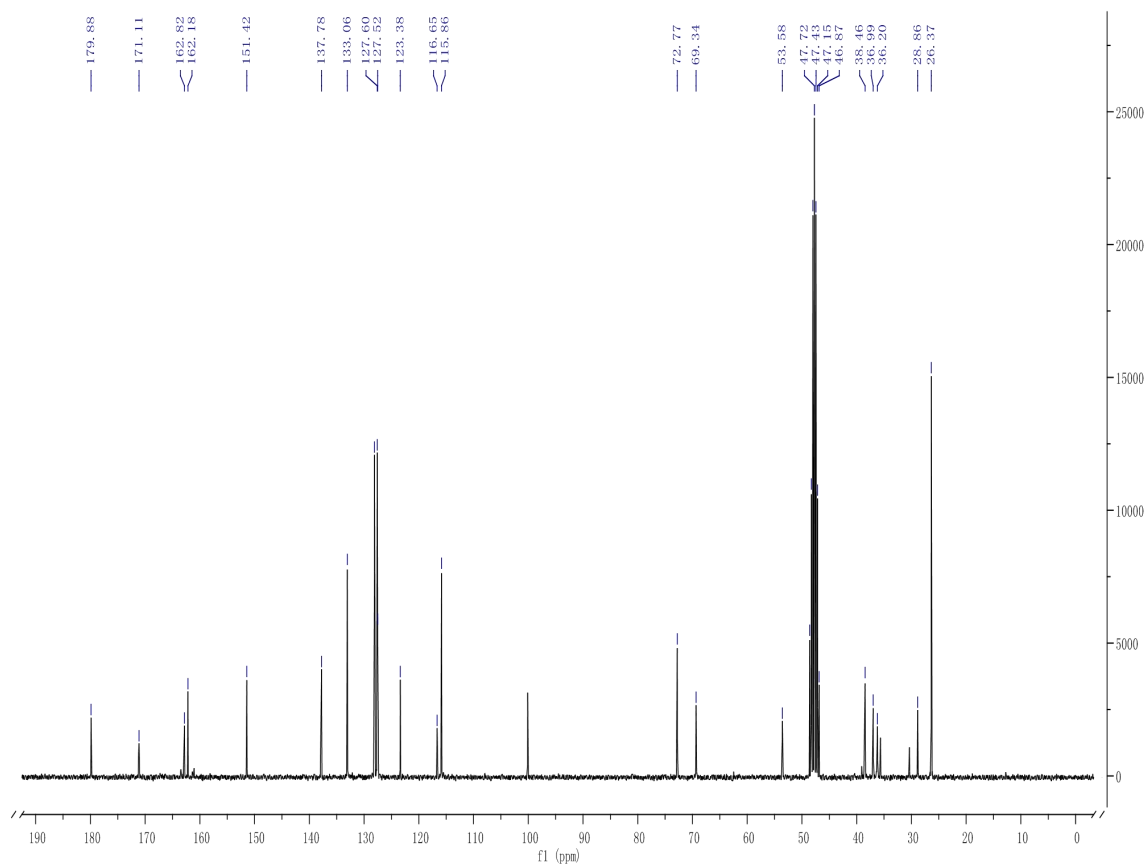

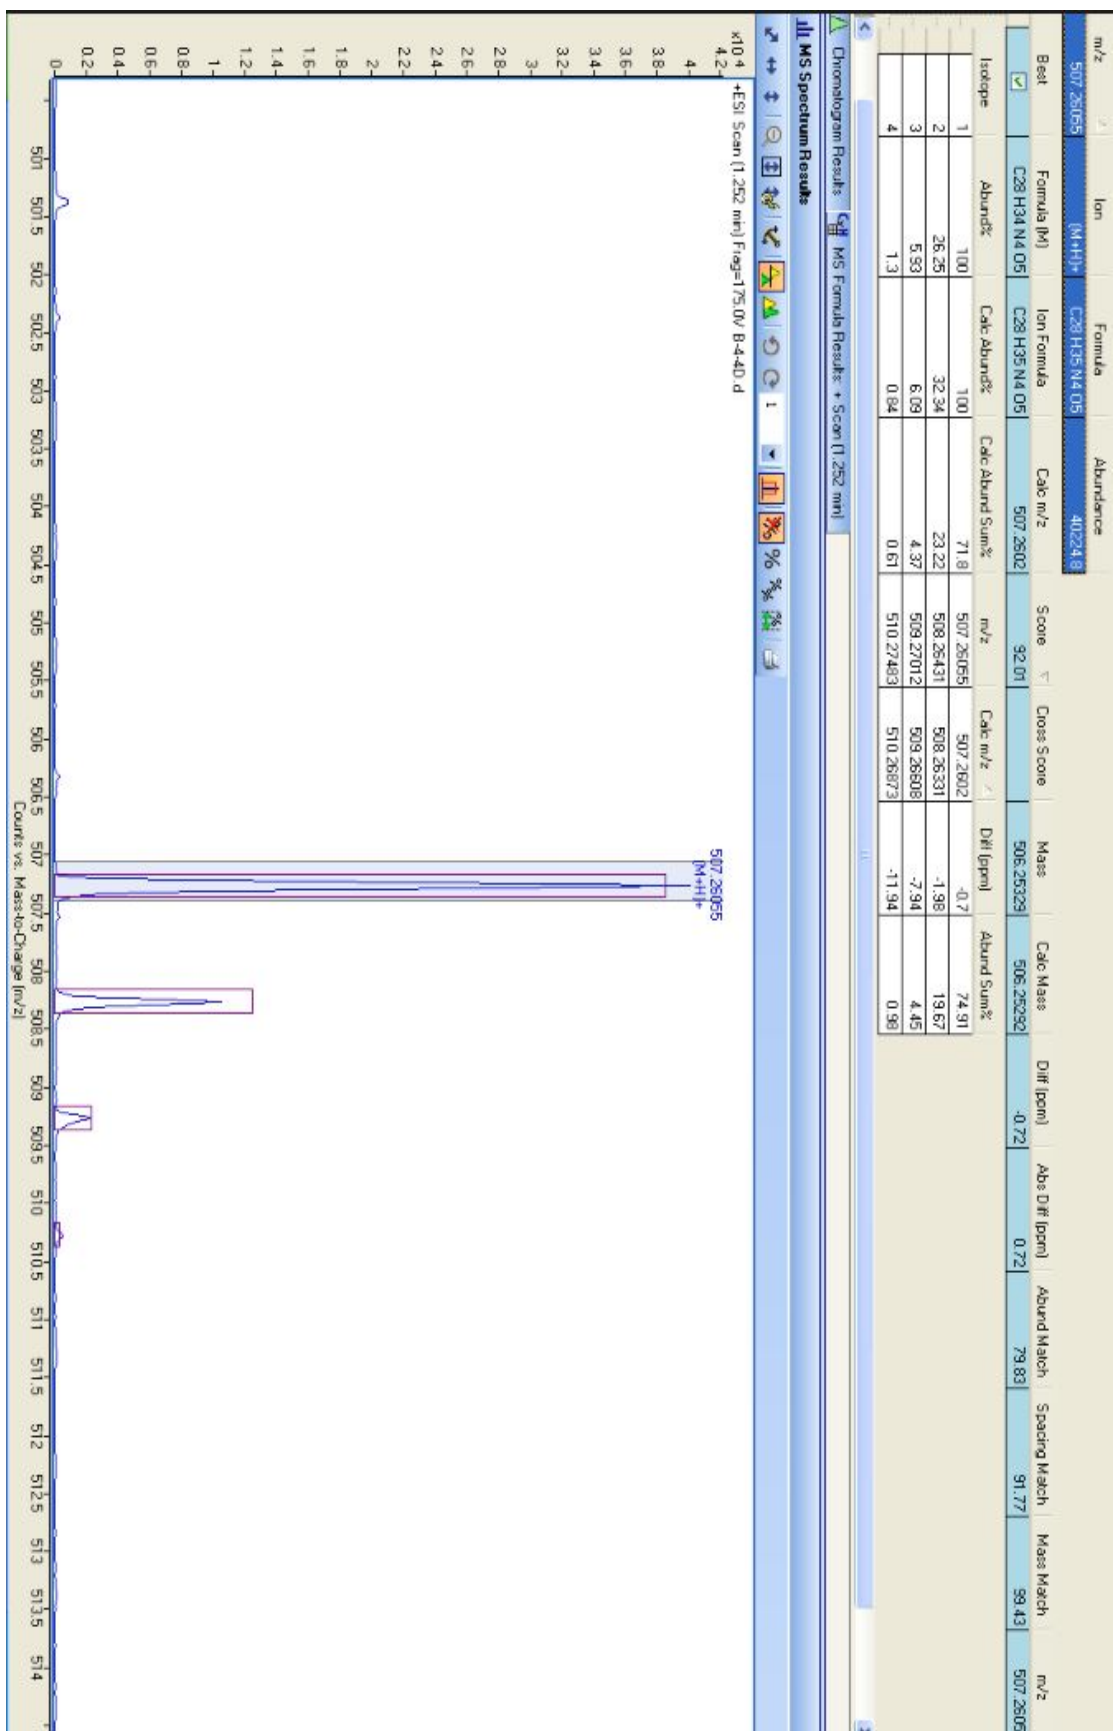



## II. Molecular docking

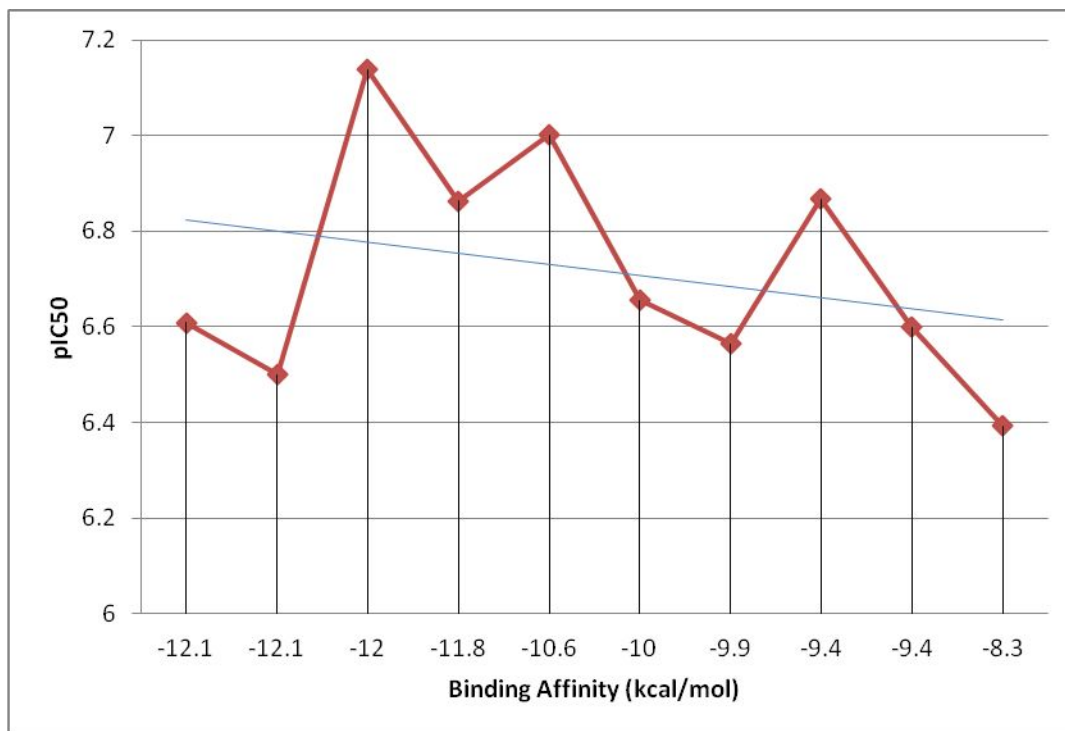

**Fig. S4.** The plot of binding affinity (kcal/mol) and pIC<sub>50</sub> ( the blue line shows the linear correlation between the binding affinity and pIC<sub>50</sub> value).

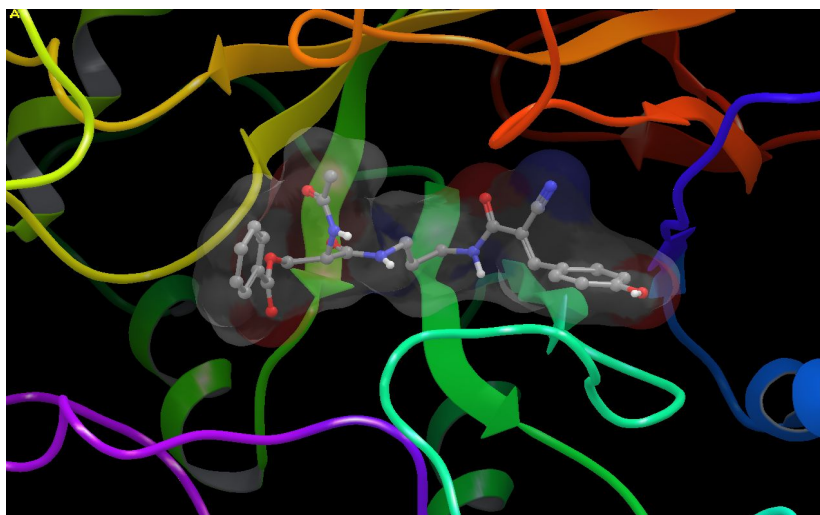

**Fig. S5.** 5e poses at the binding sites.
